## Differentially expressed miRNAs in triple negative breast cancer between African-American and non-Hispanic white women

Bruna Sugita<sup>1</sup>, Mandeep Gill<sup>2</sup>, Akansha Mahajan<sup>2</sup>, Anju Duttargi<sup>2</sup>, Saurabh Kirolikar<sup>2</sup>, Rodrigo Almeida<sup>1</sup>, Kenny Regis<sup>2</sup>, Olusayo L. Oluwasanmi<sup>2</sup>, Fabio Marchi<sup>3</sup>, Catalin Marian<sup>4,8</sup>, Kheper Makambi<sup>2,5</sup>, Bhaskar Kallakury<sup>6</sup>, Laura Sheehan<sup>7</sup>, Iglener J. Cavalli<sup>1</sup>, Enilze M. Ribeiro<sup>1</sup>, Subha Madhavan<sup>2,7</sup>, Simina Boca<sup>2,7</sup>, Yuriy Gusev<sup>2,7</sup>, Luciane R. Cavalli<sup>2</sup>

<sup>1</sup>Department of Genetics, Federal University of Paraná, Curitiba, PR, Brazil

<sup>2</sup>Department of Oncology, Lombardi Comprehensive Cancer Center, Georgetown University Medical Center, Washington, DC, USA

<sup>3</sup>International Research Center-CIPE, A. C. Camargo Cancer Center, São Paulo, SP, Brazil

<sup>4</sup>The Ohio State University Comprehensive Cancer Center, Division of Cancer Prevention and Control, College of Medicine, The Ohio State University, Columbus, Ohio

<sup>5</sup>Departments of Biostatistics, Bioinformatics, and Biomathematics, Georgetown University, Washington, DC USA

<sup>6</sup>Department of Pathology, Georgetown University Medical Center, Washington, DC, USA

<sup>7</sup>Innovation Center for Biomedical Informatics, Lombardi Comprehensive Cancer Center, Georgetown University Medical Center, Washington, DC, USA

<sup>8</sup>The University of Medicine and Pharmacy Timisoara, Timisoara, Romania

**Correspondence to:** Luciane R. Cavalli, **email:** lrc@georgetown.edu

**Keywords:** *microRNA, triple negative breast cancer, African American, non-Hispanic white, copy number*

**Received:** July 02, 2016

**Accepted:** October 25, 2016

**Published:** November 02, 2016

### ABSTRACT

**Triple Negative Breast Cancer (TNBC), a clinically aggressive subtype of breast cancer, disproportionately affects African American (AA) women when compared to non-Hispanic Whites (NHW). MiRNAs(miRNAs) play a critical role in these tumors, through the regulation of cancer driver genes. In this study, our goal was to characterize and compare the patterns of miRNA expression in TNBC of AA ( $n = 27$ ) and NHW women ( $n = 30$ ). A total of 256 miRNAs were differentially expressed between these groups, and distinct from the ones observed in their respective non-TNBC subtypes. Fifty-five of these miRNAs were mapped in cytobands carrying copy number alterations (CNAs); 26 of them presented expression levels concordant with the observed CNAs. Receiving operating characteristic (ROC) analysis showed a good power (AUC  $\geq 0.80$ ; 95% CI) for over 65% of the individual miRNAs and a high combined power with superior sensitivity and specificity (AUC = 0.88 (0.78–0.99); 95% CI) of the 26 miRNA panel in discriminating TNBC between these populations. Subsequent miRNA target analysis revealed their involvement in the interconnected PI3K/AKT, MAPK and insulin signaling pathways. Additionally, three miRNAs of this panel were associated with early age at diagnosis. Altogether, these findings indicated that there are different patterns of miRNA expression between TNBC of AA and NHW women and that their mapping in genomic regions with high levels of CNAs is not merely physical, but biologically relevant to the TNBC phenotype. Once validated in distinct cohorts of AA women, this panel can potentially represent their intrinsic TNBC genome signature.**

### INTRODUCTION

Triple negative breast cancer (TNBC) is a clinically aggressive subtype of breast cancer that confers a high risk of metastasis development, usually shortly after the initial

diagnosis [1]. Despite numerous advances identifying and testing potential biomarkers and their corresponding therapeutic compounds in TNBC clinical trials, an effective and approved targeted therapy for these tumors is not yet available [2, 3].

Variation among different racial and ethnic groups in the incidence of breast cancer molecular subtypes and clinical outcomes is well documented [4, 5]. The basal-like tumors, in particular TNBC, are present at higher frequencies in African American (AA) women when compared to non-Hispanic Whites (NHW), Hispanics or Asian women [5]. AA women with TNBC disease are usually diagnosed at an earlier age and more advanced stage, and likely to develop early metastasis compared to NHW women [5]. An increased number of studies have characterized the differences in tumor biology between AA and NHW patients and have shown that breast tumors from AA patients present increased cell proliferation, elevated expression of angiogenesis markers and higher migration and invasive properties [6–8]. These findings suggest that although socio-economic and cultural factors play a role, biological factors can also be the major drivers of these disparities [8, 9].

MicroRNAs (miRNAs) are a class of non-coding endogenous RNA molecules that have been identified to play a role in breast cancer, through the regulation of cellular processes associated with aggressive tumor phenotypes, such as TNBC, that rapidly progress to metastatic disease and develop treatment resistance [10]. A number of miRNAs were observed with differential expression in TNBC in comparison to non-TNBC subtypes [11]. Interestingly, as in gene expression studies, miRNA expression profiling has been shown to discriminate the intrinsic molecular breast cancer subtypes [12]. MiRNA expression varies according to ethnicity [13]. A number of studies have shown germline miRNA polymorphisms in association with the susceptibility risk of breast cancer in specific ethnic populations [14–19]. However, there are limited reports on somatic miRNA expression levels in the breast tissue of these populations [20, 21]. Consequently, the variation of the miRNA expression levels in the tumors of AA in comparison to NHW or other groups is not well known.

In this study our primary goal was to characterize the main patterns of miRNA expression in the breast tumor tissue of AA patients with TNBC in comparison to that of NHW patients with TNBC by using genome-wide miRNA profiling. A number of significant miRNAs were observed to be differentially expressed between these groups. These miRNAs were distinct from the ones differentially expressed in the non-TNBC subtypes of both AA and NHW patients. The association of the miRNA expression with copy number data, performed by array-CGH analysis in the same TNBC specimens of the AA patients, revealed a panel of 26 miRNAs which mapped in the most frequent cytobands with copy number alterations (CNAs) and with their expression levels directly corresponded to copy number gains or losses. Receiving operating characteristic (ROC) curve analysis of the individual miRNAs of this panel showed that over 65% of them presented a good discriminatory power value between the TNBC of AA and

NHW patients. Subsequently, by applying a pipeline of comprehensive computational analysis, several critical and interconnected cancer gene networks and signaling pathways were found to be regulated by these miRNAs and their validated targets. Finally, association with clinical-pathological data from the patients revealed that three miRNAs from this 26 miRNA panel were associated with early patients' age at onset.

## RESULTS

### Differentially expressed miRNAs of TNBC and non-TNBC in African American and NHW women

MiRNA profiling was successfully performed in 88.9% (24/27) of the TNBC and non-TNBC (24/27) cases of the AA patients and in 93% (28/30) of the TNBC and 83.3% (25/30) of the non-TNBC cases of the NHW patients. The differentially expressed miRNAs were initially compared between each tumor subtype (TNBC and non-TNBC) for each group of patients according to the workflow of Figure 1.

The comparison of the miRNA expression levels of the TNBC and non-TNBC cases in the AA group revealed 194 miRNAs differentially expressed (*t*-test;  $P < 0.01$ ; FDR  $< 0.05$ ). The top 15 significant miRNAs observed up- and down-regulated, based on log<sub>2</sub> fold change value, are presented in Supplementary Table S1. Unsupervised and Supervised Hierarchical Clustering analysis (Pearson correlation;  $P < 0.01$ , FDR  $< 0.05$ ) applied to these tumors distinctly clustered the TNBC and non-TNBC tumors, with the exception of six and four cases, respectively (Figure 2).

To explore the function of each of the 194 identified miRNAs, we used DIANA miRPath analysis to perform KEGG pathway enrichment analysis. Among the top 15 pathways identified, based on *P* value, were the ones related to Pathways in Cancer, PI3K/AKT and MAPK signaling pathways (Supplementary Table S2).

The comparison of the miRNA expression levels of the TNBC and non-TNBC cases from the NHW patients revealed 336 miRNAs differentially expressed (*t*-test;  $P < 0.01$ ; FDR  $< 0.05$ ). The top 15 significant miRNAs observed up-regulated, based on log<sub>2</sub> fold change value, are presented in Supplementary Table S3. For the down-regulated miRNAs, only a set of 12 miRNAs was observed in this analysis (Supplementary Table S3). Unsupervised and Supervised Hierarchical Clustering analysis (Pearson correlation;  $P < 0.01$ , FDR  $< 0.05$ ) applied to these tumors distinctly clustered the TNBC and non-TNBC cases, with the exception of one and two cases, respectively (Figure 2). As for the AA group, among the top 15 KEGG pathways identified by DIANA miRPath analyses in the NHW group, based on *P* value, were the ones related to Pathways in Cancer, PI3K/AKT and MAPK signaling pathways (Supplementary Table S4).

Finally, the comparison of the miRNA expression levels of the TNBC cases from both groups of patients, revealed 256 miRNAs differentially expressed (*t*-test;  $P < 0.01$ , FDR  $< 0.05$ ). The top 15 significant miRNAs observed up- and down-regulated, based on log<sub>2</sub> fold change value, are presented in Table 1. Unsupervised and Supervised Hierarchical Clustering analysis (Pearson correlation;  $P < 0.01$ , FDR  $< 0.05$ ) distinctly clustered the TNBC from the AA and NHW patients, with the exception of ten and four cases, respectively (Figure 3).

### DNA copy number analysis of TNBC in African American patients and association with miRNA expression levels

Array-CGH analysis was performed in the 27 TNBC cases of the AA group, 24 of which were also profiled for miRNA expression. A total number of 388 copy number alterations (CNAs) (as measured by the “number of calls”) were identified, with an average of 14.4 CNAs per case. The most frequent cytobands affected by CNAs were: 1q21.1-q44 and 8q11.1-q24 (in 55% of the cases), 3q11.1-q29 and 6p25.3-p12.1 (44% of the cases),

9p24.3-p13.1, 12p13.33-p11.1 and Xp22.33-p11.21 (39% of the cases) and 2p25.3-p11.2, 5p15.33-p12, 6q16.1-q25.3, 7q11.23-q36.3, 10p15.3-p11.1, 13q21.2-q34, 16p13.3-p11.1, 18p11.32-p11.21, 19p13.3-p12 and 19q12-q13.33 (26–33% of the cases) (Figure 4). A number of 7,362 genes were found to be located in these cytobands with CNAs, as generated by the Agilent Cytogenomics probe report.

For the association of CNAs with miRNA expression, the genomic location of the initial set of 256 miRNAs found differentially expressed between the TNBC of AA and NHW patients was verified. Fifty-five of them were located in the cytobands mostly affected by CNAs in the same AA-TNBC cases profiled by array-CGH as described above. From these 55 miRNAs, 26 presented expression levels in concordance with the observed CNAs (i.e. up-regulated miRNA expression/cytoband with copy number gain and/or down-regulated miRNA expression /cytoband with copy number loss) at their respective genome locus (Table 2, Figure 4), including the miR-150-5p, miR-200c-3p and miR-205-5p that were among the top 15 miRNAs with highest fold changes observed differentially expressed between the AA and NHW groups of patients (Table 1).

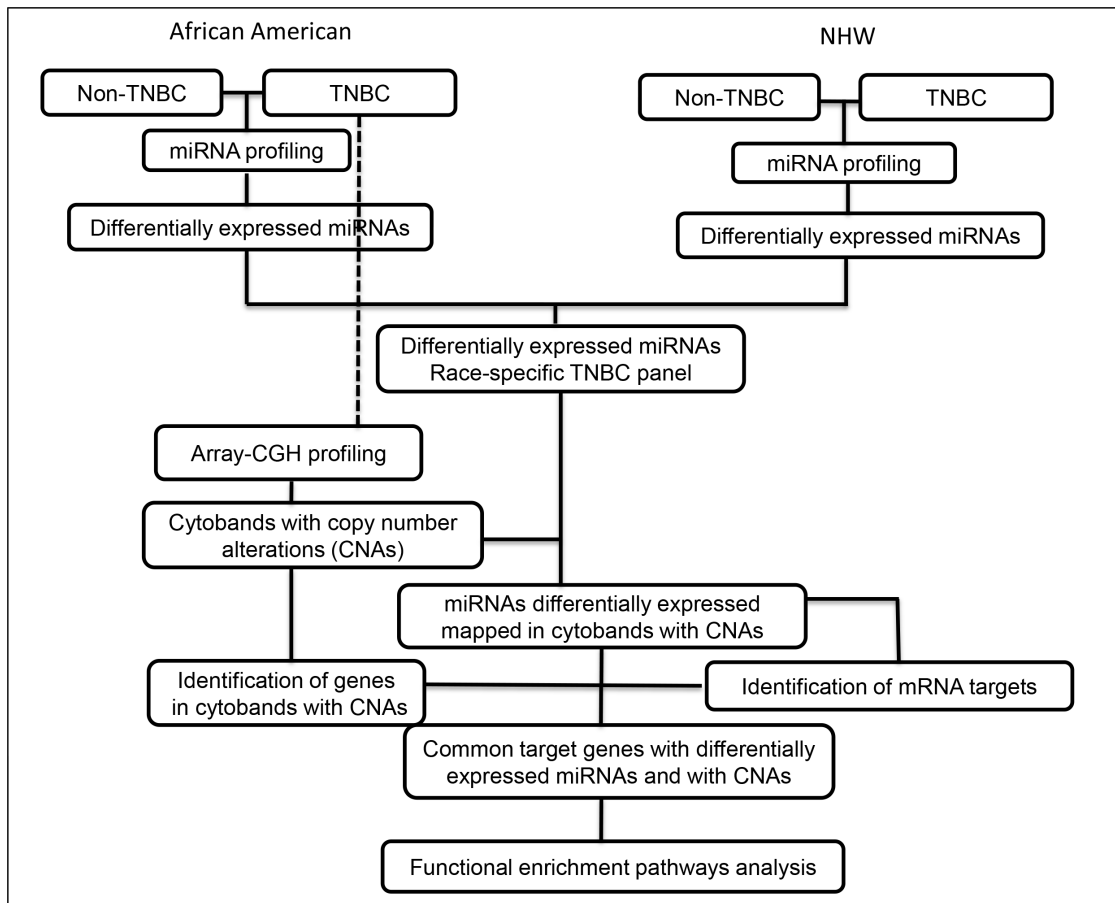

**Figure 1: Workflow of miRNA expression and copy number profiling and downstream comprehensive computational analysis performed in the TNBC and non-TNBC cases of AA and NHW group of patients.**

The average of the individual expression level (box plots) of the 26 miRNA panel in the TNBC of the AA and NHW's groups is shown in Figure 5. In the AA-TNBC group of patients, 9 to 24 of these selected 26 miRNAs were observed with alteration in their expression levels, with an average of  $19.25 \pm 0.85$  miRNAs with expression changes per case. In the NHW-TNBC group, 8 to 24 of these miRNAs presented expression changes, with an average of  $17.96 \pm 0.88$  miRNAs with expression changes per case. This difference was not statistically significant at  $P < 0.05$ .

Next, we integrated the copy number and miRNA expression data to determine gene targets that were potentially affected by both of these mechanisms. The 7,362 genes identified to be located in the cytobands affected by CNAs were "matched" with the miRNA targets of the 26 selected miRNAs. A number of 5,010 miRNA targets were identified, predicted by at least two miRNA target databases. The integration of these data revealed 1,557 common genes, reducing the number of targets to 69%. However, when the miRNA targets were integrated with the genes located in the most frequent cytobands (altered in  $\geq 40\%$  of the cases: 1q21.1-q44, 3q11.1-q29, 6p25.3-p12.1 and 8q11.1-q24.3) a larger reduction (86%: from 1,557 to 711) of the targets was observed (Figure 6).

## Receiver operating characteristic (ROC) curve analysis

Individual ROC analysis of the 26 miRNAs of the identified panel showed that over 65% of them presented a good power in discriminating between the TNBC cases of AA and NHW group of patients [(Area Under the Curve (AUC)  $\geq 0.80$  with 95% Confidence Interval (CI)]. The highest discriminatory power was observed for miR-1125-3p (AUC = 0.89; 95%CI: 0.81-0.98), followed by miR-216a-5p, miR-532-5p, miR-580-3p, miR-599, miR-769-5p, miR-18a-5p, miR-28-5p, miR-182-5p, miR-183-5p, miR-1263, miR-4284, miR-4458, miR-205-5p, miR-614 and miR-940 (AUC values from 0.87 to 0.80). The remaining nine miRNAs of the 26 miRNA panel, presented AUC values ranging from 0.75 to 0.79. The combined analysis of the panel showed a AUC value of 0.88, demonstrating the robust power of the 26 miRNA panel, with a high and combined superior level of sensitivity and specificity (0.78 and 0.99, respectively) in discriminating TNBC between these populations. The ROC plots, AUC values and the corresponding 95% confidence intervals for each of the 26 miRNAs and for the combined panel are presented in Figure 7 and Supplementary Table S5, respectively.

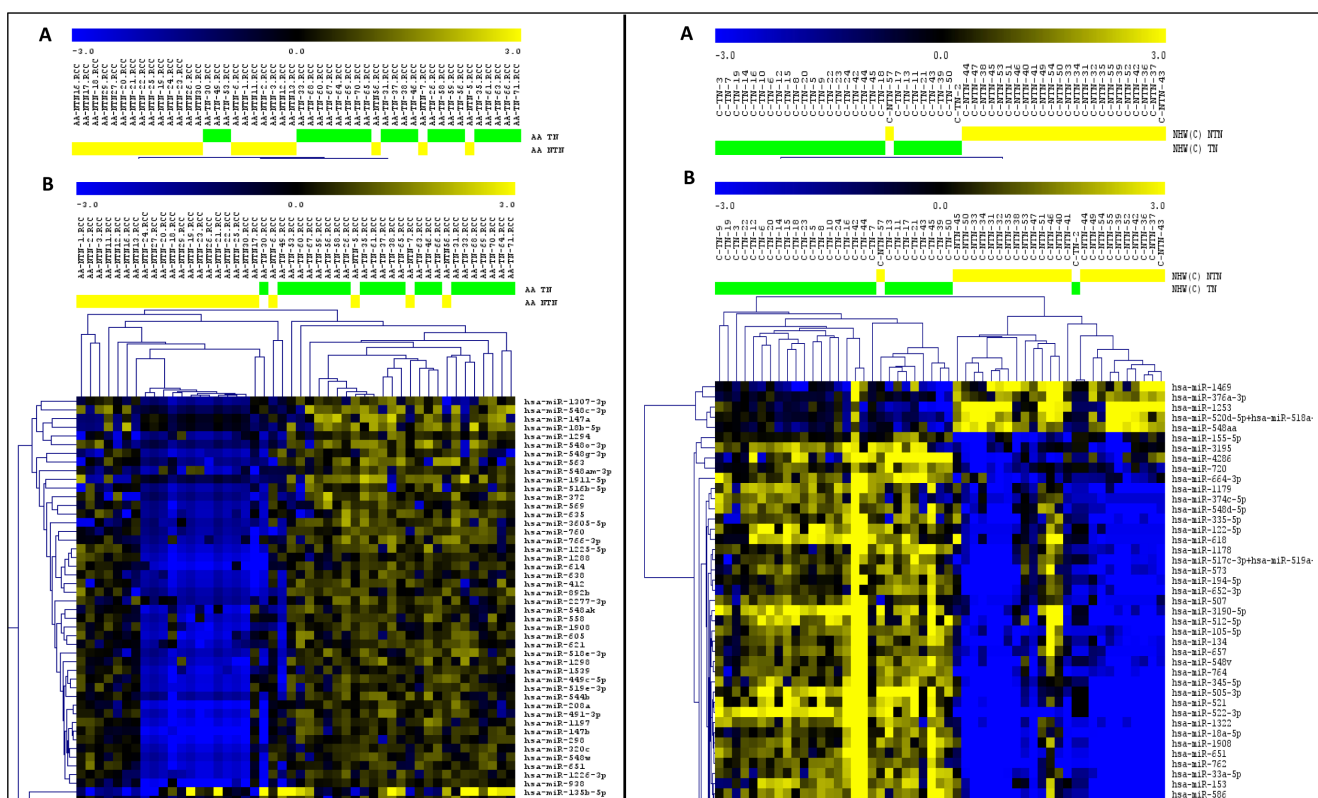

**Figure 2: Unsupervised (A) and Supervised (B) Hierarchical Clustering analysis applied to the TNBC (green bars) and non-TNBC (yellow bars) cases of the AA and NHW group of patients (left and right panel respectively). Up-regulated miRNAs (yellow) and down-regulated miRNAs (blue). (MeV4.9; Pearson correlation,  $P < 0.01$ , FDR  $< 0.05$ ).**



**Table 1: Top 15 miRNAs (based on log2FC) observed up- and down-regulated in the TNBC subtype of the AA and NHW group of patients**

| MiRNAs up-regulated | Log2 FC | P-value  | FDR         | MiRNAs down-regulated         | Log2 FC | P-value  | FDR      |
|---------------------|---------|----------|-------------|-------------------------------|---------|----------|----------|
| hsa-miR-9-5p        | 3.138   | 8.61E-06 | 6.75E-05    | hsa-miR-1253                  | -5.063  | 5.99E-10 | 5.99E-08 |
| hsa-miR-127-3p      | 3.065   | 1.33E-07 | 2.87E-06    | hsa-miR-1283                  | -4.601  | 9.57E-06 | 7.36E-05 |
| hsa-miR-451a        | 2.993   | 1.56E-05 | 1.08E-04    | hsa-miR-378e                  | -4.241  | 6.90E-06 | 5.75E-05 |
| hsa-miR-205-5p      | 2.925   | 7.82E-05 | 3.86E-04    | hsa-miR-549                   | -4.136  | 3.45E-08 | 1.25E-06 |
| hsa-miR-548p        | 2.850   | 4.07E-08 | 1.36E-06    | hsa-miR-1268b                 | -3.082  | 3.41E-13 | 2.72E-10 |
| hsa-miR-4508        | 2.838   | 8.25E-08 | 2.06E-06    | hsa-miR-1265                  | -2.781  | 3.80E-11 | 1.01E-08 |
| hsa-miR-4425        | 2.829   | 2.36E-08 | 9.45E-07    | hsa-miR-433                   | -2.750  | 2.22E-12 | 8.88E-10 |
| hsa-miR-150-5p      | 2.730   | 6.20E-04 | 0.002119733 | hsa-miR-1305                  | -2.748  | 1.30E-08 | 5.80E-07 |
| hsa-miR-374a-5p     | 2.682   | 2.03E-05 | 1.33E-04    | hsa-miR-518f-3p               | -2.746  | 4.11E-11 | 8.23E-09 |
| hsa-miR-455-3p      | 2.507   | 2.51E-09 | 2.01E-07    | hsa-miR-649                   | -2.731  | 2.93E-10 | 3.35E-08 |
| hsa-miR-424-5p      | 2.499   | 3.97E-07 | 5.78E-06    | hsa-miR-520e                  | -2.689  | 4.79E-11 | 7.67E-09 |
| hsa-miR-423-5p      | 2.467   | 3.15E-07 | 5.25E-06    | hsa-miR-206                   | -2.671  | 3.38E-08 | 1.29E-06 |
| hsa-miR-200c-3p     | 2.465   | 6.10E-04 | 0.002093624 | hsa-miR-520d-5p, 518a-5p, 527 | -2.647  | 1.46E-06 | 1.60E-05 |
| hsa-miR-606         | 2.453   | 3.54E-08 | 1.23E-06    |                               |         |          |          |
| hsa-miR-26a-5p      | 2.449   | 7.54E-05 | 3.84E-04    |                               |         |          |          |

FC = fold change, FDR = false discovery rate.

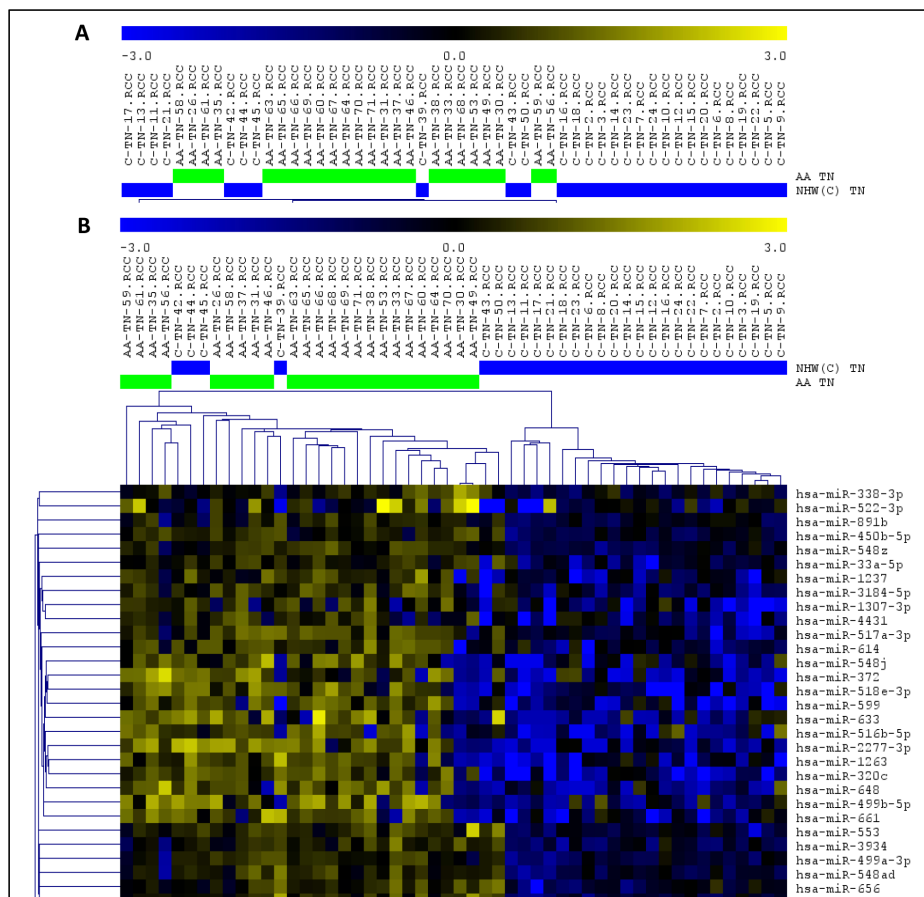

**Figure 3: Unsupervised (A) and Supervised (B) Hierarchical Clustering analysis applied to the TNBC cases of the AA (green bars) and NHW (blue bars) group of patients. Up-regulated miRNAs (yellow) and down-regulated miRNAs (blue). (MeV4.9; Pearson correlation,  $P < 0.01$ ,  $FDR < 0.05$ ).**

## Functional enriched pathways

To explore the function of each of the miRNAs composing the 26 miRNA panel of differentially expressed miRNAs in the TNBC of AA and NHW groups and their corresponding targets, we performed KEGG pathway enrichment analysis. The top pathway identified (based on the lowest  $P$  value) was the neurotrophin signaling pathway. Twenty-three (88.5%) miRNAs of this panel were involved in this pathway. The next most significant pathways were the MAPK, insulin and PI3K/AKT signaling pathways, involving 92.3%, 88.5% and 88.5% of the 26 miRNAs, respectively. For the MAPK pathways the miRNAs not present were miR-614 and miR-4431 and for the insulin and PI3K/AKT were the miR-548ad-3p, miR-614 and miR-4431 (Table 3). These three pathways are interconnected, presenting several miRNA target genes in common (Supplementary Figure S1). IPA analysis showed that the selected 26 miRNAs are involved in the processes of cellular growth and proliferation, cell cycle, cell-to-cell signaling and interaction, and cell death and survival. This analysis also generated a gene network with 12 out of the 26 miRNAs of our panel targeting established cancer-related genes, such as *TP53*, *MYC*, *MYB*, *ZEB1*, *CCND3* and *TGF $\beta$*  (Figure 8).

## Association of the 26 miRNA panel with the clinical-pathological variables of the TNBC and non-TNBC cases of the AA and NHW groups of patients

Clinical-pathological variables at diagnosis, such as age, tumor size, stage and grade, and lymph node metastasis status and at follow up including local and/or distant metastasis recurrence were analyzed separately for each ethnic group in the TNBC and non-TNBC subtypes (Table 4). AA patients with the TNBC subtype presented an earlier age at diagnosis when compared to

patients with the non-TNBC subtype ( $50.74 \pm 1.55$  and  $57.41 \pm 2.79$ , respectively;  $P = 0.0413$ ). AA patients with the TNBC subtype also presented a higher frequency of stage III (88.9%) and grade 3 (88.5%) tumors when compared to patients with the non-TNBC subtype (42.3% and 50%,  $P = 0.001$  and  $P = 0.009$ , respectively). For the other clinical parameters, tumor size, lymph node, local recurrence and distant metastasis status, no significant difference was observed between the TNBC and non-TNBC cases in the AA group of patients.

In the NHW group of patients, no difference was observed in the mean age at diagnosis between the TNBC and non-TNBC subtypes. However, tumor size was significantly higher in the TNBC subtype of the NHW patients when compared to the non-TNBC subtype ( $2.96 \pm 0.31$  and  $1.99 \pm 0.25$ , respectively;  $P = 0.019$ ). A higher level of significance was observed regarding tumor stage and grade in this group of patients: TNBC patients presented 89.7% of stage III and 92.8% of grade 3 tumors when compared to the non-TNBC patients (36.4% of both stage III and grade 3 tumors;  $P = 0.0002$  and  $P < 0.0001$  respectively). As for the AA patients, the other clinical parameters evaluated were not differently distributed in the tumor subtypes of the NHW patients.

Next, these analyses were performed comparing the tumor subtypes between the AA and NHW groups. A “borderline” significant difference was observed in relation to the presence of local recurrence in the TNBC group; AA patients presented a higher frequency of local recurrence when compared to the NHW patients (33.3% and 10.3%, respectively;  $P = 0.0519$ ). None of the other parameters were significantly different in the TNBC or non-TNBC subtypes between these patients’ groups (Table 4).

The association of the expression levels of the 26 miRNA panel and clinical-pathological variables from the TNBC patients revealed that three miRNAs were significantly associated with age at the time of surgery, while adjusting for ethnicity, tumor size, and lymph node

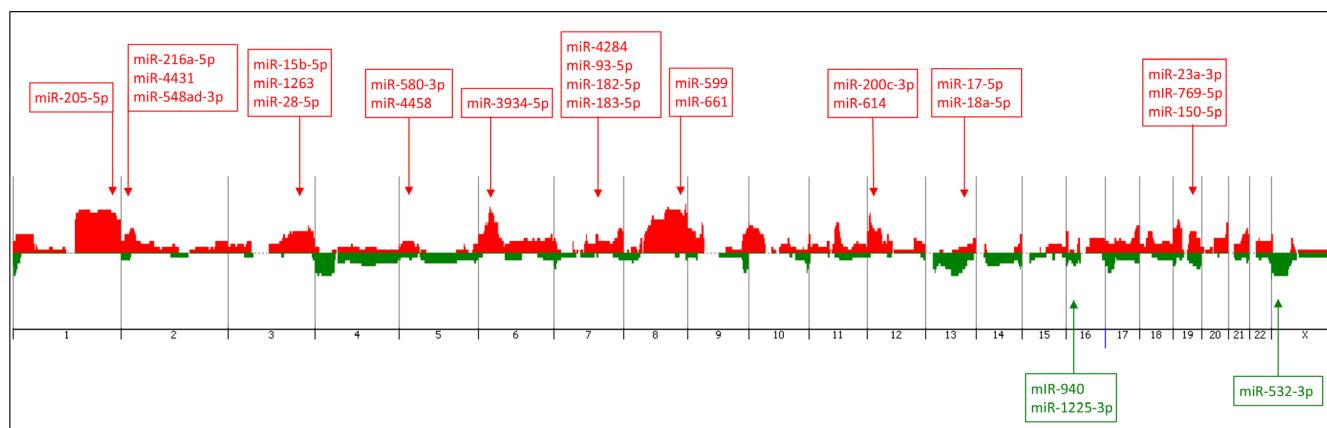

**Figure 4: Penetrance plot of the array-CGH profiling of the TNBC cases from the AA patients analyzed, showing the corresponding genome location (arrows) of the 26 miRNAs of the identified panel.** Vertical lines represent each chromosome number. Red peaks indicate copy number gains and green peaks indicate copy number losses. MiRNAs with up- and down-regulated expression levels are annotated in red and green color boxes, respectively.

**Table 2: Twenty-six miRNAs differentially expressed between the TNBC of the AA and NHW patients, with expression levels in concordance with copy number alterations (CNAs) (presented by chromosome numerical order)**

| MiRNAs           | Cytoband | Start     | Stop      | CNAs | miRNA expression | Log2FC | P value  |
|------------------|----------|-----------|-----------|------|------------------|--------|----------|
| hsa-miR-205-5p   | 1q32.2   | 209432133 | 209432242 | gain | up-regulated     | 2.925  | 7.82E-05 |
| hsa-miR-216a-5p  | 2p16.1   | 55988950  | 55989059  | gain | up-regulated     | 1.059  | 7.65E-07 |
| hsa-miR-4431     | 2p16.2   | 52702522  | 52702615  | gain | up-regulated     | 1.220  | 2.42E-04 |
| hsa-miR-548ad-3p | 2p25.1   | 35471405  | 35471486  | gain | up-regulated     | 0.690  | 8.22E-04 |
| hsa-miR-15b-5p   | 3q25.33  | 160404588 | 160404685 | gain | up-regulated     | 2.202  | 2.97E-04 |
| hsa-miR-1263     | 3q26.1   | 164171471 | 164171556 | gain | up-regulated     | 1.375  | 2.69E-04 |
| hsa-miR-28-5p    | 3q28     | 188688781 | 188688866 | gain | up-regulated     | 1.655  | 2.28E-05 |
| hsa-miR-580-3p   | 5p13.2   | 36147892  | 36147988  | gain | up-regulated     | 1.526  | 7.47E-07 |
| hsa-miR-4458     | 5p15.31  | 8460925   | 8460999   | gain | up-regulated     | 2.224  | 4.79E-07 |
| hsa-miR-3934-5p  | 6p21.31  | 33698128  | 33698234  | gain | up-regulated     | 0.754  | 2.99E-04 |
| hsa-miR-4284     | 7q11.23  | 73711317  | 73711397  | gain | up-regulated     | 1.981  | 4.65E-06 |
| hsa-miR-93-5p    | 7q22.1   | 100093768 | 100093847 | gain | up-regulated     | 2.230  | 1.88E-04 |
| hsa-miR-182-5p   | 7q32.2   | 129770383 | 129770492 | gain | up-regulated     | 2.026  | 7.77E-05 |
| hsa-miR-183-5p   | 7q32.2   | 129774905 | 129775014 | gain | up-regulated     | 1.717  | 7.54E-05 |
| hsa-miR-599      | 8q22.2   | 99536636  | 99536730  | gain | up-regulated     | 1.755  | 7.81E-06 |
| hsa-miR-661      | 8q24.3   | 143945191 | 143945279 | gain | up-regulated     | 1.307  | 7.37E-04 |
| hsa-miR-614      | 12p13.1  | 12915829  | 12915918  | gain | up-regulated     | 1.021  | 4.31E-04 |
| hsa-miR-200c-3p  | 12p13.31 | 6963699   | 6963766   | gain | up-regulated     | 2.465  | 6.10E-04 |
| hsa-miR-17-5p    | 13q31.3  | 91350605  | 91350688  | gain | up-regulated     | 1.990  | 3.21E-04 |
| hsa-miR-18a-5p   | 13q31.3  | 91350751  | 91350821  | gain | up-regulated     | 1.160  | 3.60E-05 |
| hsa-miR-940      | 16p13.3  | 2271747   | 2271840   | loss | down-regulated   | -1.118 | 2.05E-04 |
| hsa-miR-1225-3p  | 16p13.3  | 2090195   | 2090284   | loss | down-regulated   | -1.953 | 1.29E-07 |
| hsa-miR-23a-3p   | 19p13.12 | 13836587  | 13836659  | gain | up-regulated     | 2.334  | 9.01E-05 |
| hsa-miR-769-5p   | 19q13.32 | 46018932  | 46019049  | gain | up-regulated     | 1.355  | 2.46E-06 |
| hsa-miR-150-5p   | 19q13.33 | 49500762  | 49500873  | gain | up-regulated     | 2.730  | 6.20E-04 |
| hsa-miR-532-5p   | Xp11.23  | 50003148  | 50003238  | loss | down-regulated   | -1.875 | 9.57E-08 |

CNAs = copy number alterations, FC = fold change.

status: miR-216a-5p, miR-580-3p and miR-4458 (adjusted *P* value = 0.026 for all three). They all showed a positive association with age. Neither tumor size nor lymph node status was significantly associated with the expression levels of any of the 26 miRNAs evaluated in this analysis. This analysis excluded 7 samples which had missing clinical-pathological parameters.

## DISCUSSION

The triple negative breast cancer (TNBC) subtype is observed with higher frequency in African American (AA) women in comparison to non-Hispanic White (NHW) women, usually in association with poor prognosis and high mortality rate [4, 5, 8]. This disparity has been attributed to several causes, including tumor characteristics at diagnosis, such as age, tumor size,

stage and grade [8]. In our study, however, none of these factors were significantly different between the AA and NHW patients studied; the same occurred for the non-TNBC subtypes between the groups. These findings were in agreement with previous studies showing that age and pathology stage were not different between these populations, specially in the TNBC subtype [8]. However, within each group of patients we did observe significant differences at these parameters. In the AA group, a younger age at diagnosis, higher frequency of advanced tumor stage and poorly differentiated tumors were observed in the TNBC when compared to the non-TNBC subtypes. In the NHW group the same was observed for tumor grade and stage, but not for age at diagnosis, which is in agreement with several other reports, showing that age at diagnosis has a higher impact in the AA population than in other populations [5].

MiRNA expression has been shown to present an extraordinary power in classifying breast tumor subtypes [12]. In this study, genome-wide miRNA profiling distinctively clustered most of the TNBC and non-TNBC subtypes of both AA and NHW patients. In the NHW group only two (3.8%) cases were “misclassified” by the miRNA profiling (336 miRNAs differentially expressed) as opposed to four (8.3%) cases in the AA group (194 miRNAs differentially expressed). These results confirm

the robust power of miRNA profiling in differentiating the intrinsic breast cancer molecular subtypes.

One of the most challenging aspects of analyzing tumor cells using whole genome miRNA platforms is the selection and “trriage” of the most biologically relevant miRNAs and their corresponding targets among the large output data generated by these high-density platforms. One of the strategies utilized includes multi-platforms integration and functional enriched pathway analysis [21].

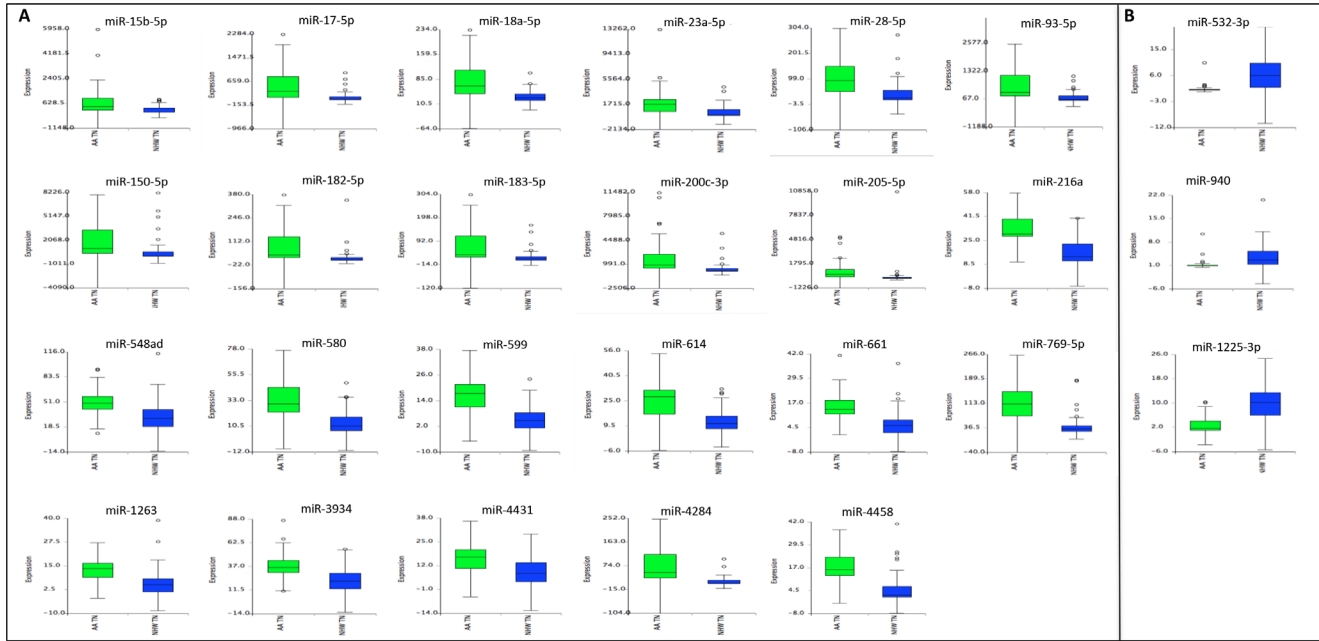

**Figure 5: Expression levels of the 26 differentially expressed miRNAs observed between the AA and NHW TNBC cases. In (A) and (B): miRNAs up-and down-regulated, respectively, in the AA group of patients when compared to the NHW group.**

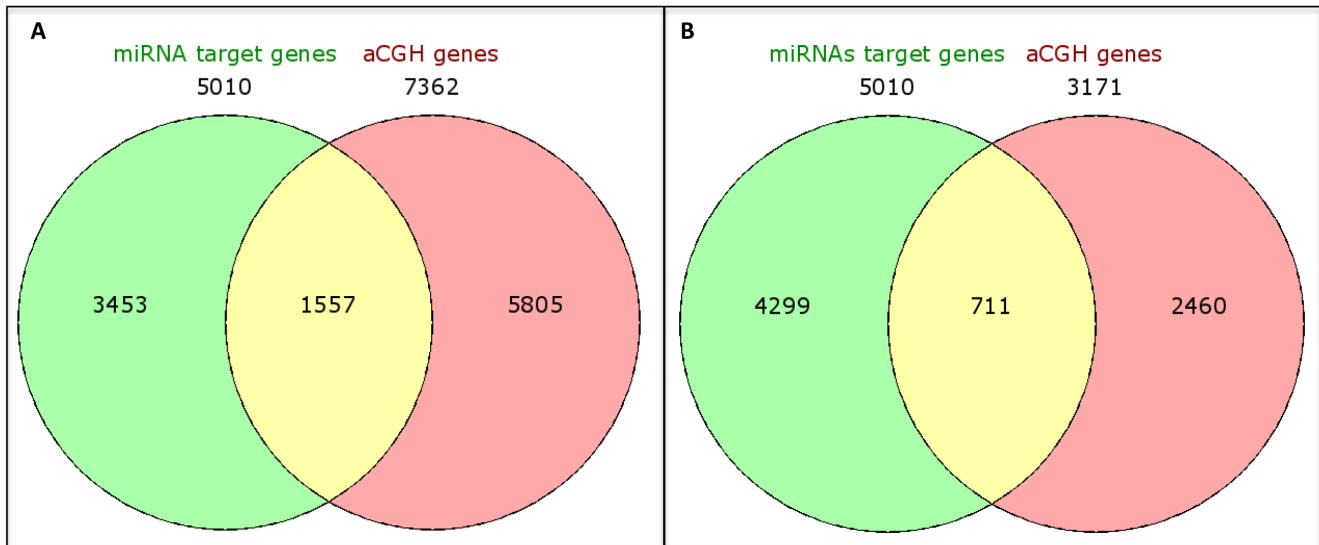

**Figure 6: Venn diagrams showing integration of genes located at the identified cytobands (A) and in the most frequent cytobands (present in greater than or equal to 50% of the cases) (B) with CNAs in the TNBC-AA cases and the corresponding miRNA target genes.**



MiRNAs are frequently located in regions of genomic instability, markedly characterized by the presence of gains and losses of genomic regions [22–24]. Previous studies have integrated the data from miRNA expression and copy number profiling in human tumors [25–27]. Most of these studies were however, not performed in tumor tissue specimens that were concomitantly analyzed by these methods; in fact the vast majority of them were based on the miRNA and array-CGH profiling data extracted from public genomic datasets [26, 27], which invariably introduce a high level of technical and sample heterogeneity considering that array platforms with different annotations and variable sample sources and material are “uniformly” combined.

In our study, these technical issues were eliminated, given that both analyses were performed in the same tissue specimens. This strategy allowed for the direct mapping of the total initial number of miRNAs differentially expressed in the TNBC of AA and NHW patients, in the genomic regions carrying CNAs, from which 26 miRNAs presented expression levels directly corresponding to copy number gains or losses. These findings are in agreement

with the integration analysis performed by others, where tumor’ miRNAs were located in genomic regions frequently amplified and/or deleted in cancer [22–24]. It is relevant to point out, however, that because some of the regions with genomics gains and losses are defined by large cytobands, it is not unusual to find the same region with either gain or loss of copy number, which can explain some of the lack of concordance of the miRNA expression levels mapped on these genomic regions [24]. In addition, several other mechanisms can impact miRNA expression regulation other than CNAs [28].

However, among the 26 miRNAs of our study, fourteen (miRs 205-5p, 15b-5p, 1263, 28-5p, 4284, 93-5p, 182-5p, 183-5p, 599, 661, 200c-3p, 17-5p, 18a-5p and 23a-3p) were located in cytobands frequently amplified in TNBC [20, 29], including the 1q21.1-q44, 3q11.1-q29, 7q11.23-q36.3, 8q11.1-q24.3, 12p13, 13q21.2-q34, and 19p13, respectively. The miRs 200c-3p, 205-5p, 548ad-3p, 661, 17-5p, 18a-5p and 93-5p which were among the top 15 miRNAs with highest fold changes observed differentially expressed between the AA and NHW

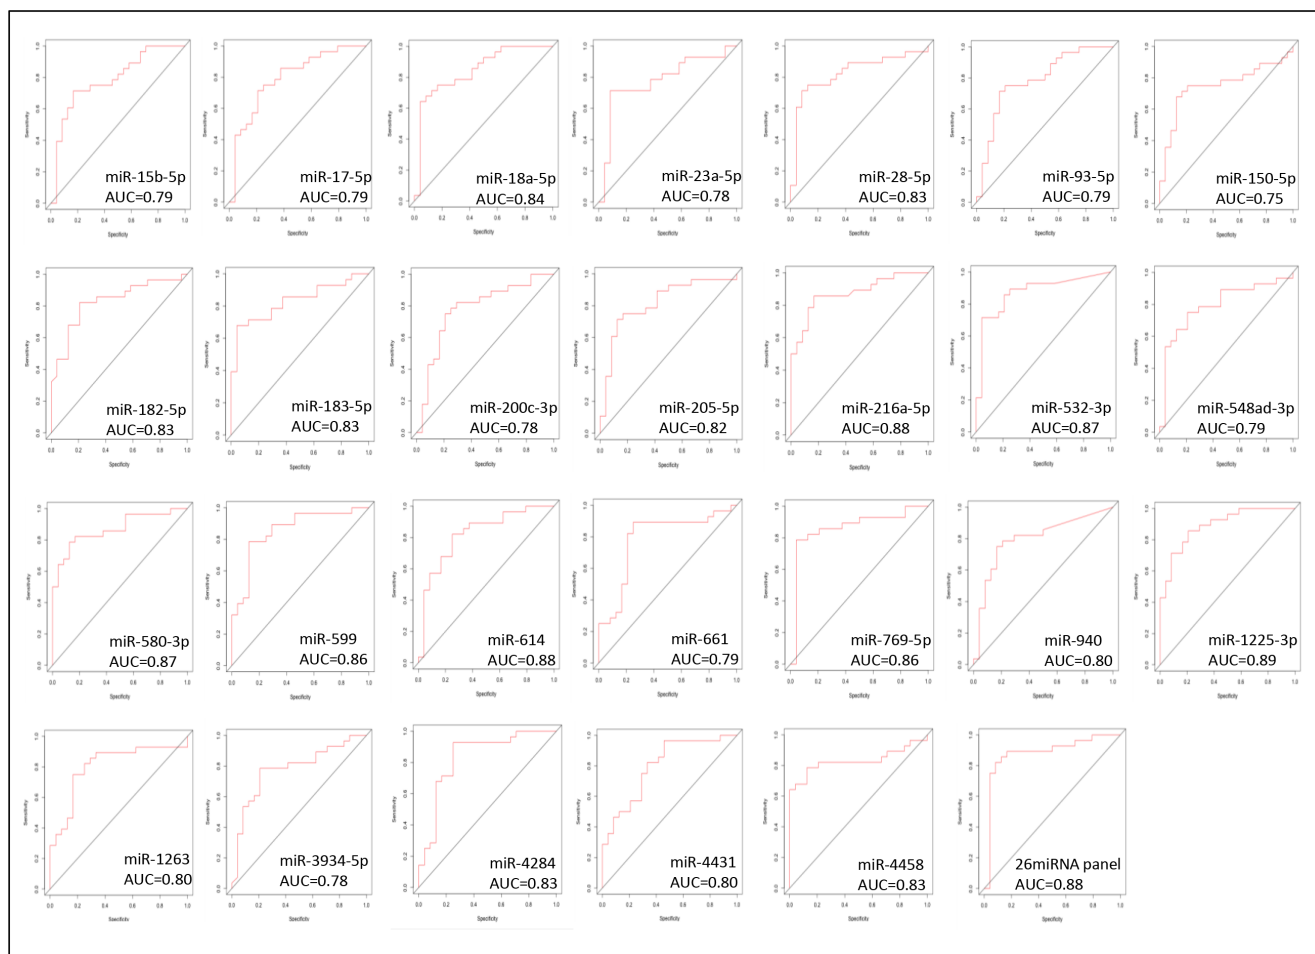

**Figure 7: ROC plots of the individual and combined 26 miRNAs differentially expressed between the AA and NHW-TNBC group of patients.**

**Table 3: Top 15 pathways (based on P value) mostly affected by the 26 miRNAs differentially expressed in the TNBC of AA and NHW groups of patients (DIANA miRPath v.2.0)**

| #  | KEGG pathway                   | P-value  | # Genes | # MiRNAs |
|----|--------------------------------|----------|---------|----------|
| 1  | Neurotrophin signaling pathway | 7.39E-32 | 68      | 23       |
| 2  | MAPK signaling pathway         | 1.61E-27 | 118     | 24       |
| 3  | Insulin signaling pathway      | 1.15E-25 | 67      | 23       |
| 4  | PI3K-AKT signaling pathway     | 3.75E-25 | 144     | 23       |
| 5  | Pathways in cancer             | 3.75E-25 | 150     | 24       |
| 6  | ERBB2 signaling pathway        | 1.06E-24 | 47      | 20       |
| 7  | TGF-beta signaling pathway     | 2.75E-24 | 45      | 20       |
| 8  | Focal adhesion                 | 1.22E-23 | 92      | 23       |
| 9  | Prostate cancer                | 3.45E-23 | 48      | 21       |
| 10 | GNRH signaling pathway         | 5.42E-23 | 48      | 22       |
| 11 | Long-term depression           | 1.37E-22 | 39      | 17       |
| 12 | Endocytosis                    | 1.25E-21 | 92      | 23       |
| 13 | Chronic myeloid leukemia       | 1.09E-20 | 41      | 21       |
| 14 | Renal cell carcinoma           | 3.06E-19 | 40      | 21       |
| 15 | Axon guidance                  | 3.26E-19 | 65      | 24       |

KEGG = Kyoto Encyclopedia of Genes and Genomes.

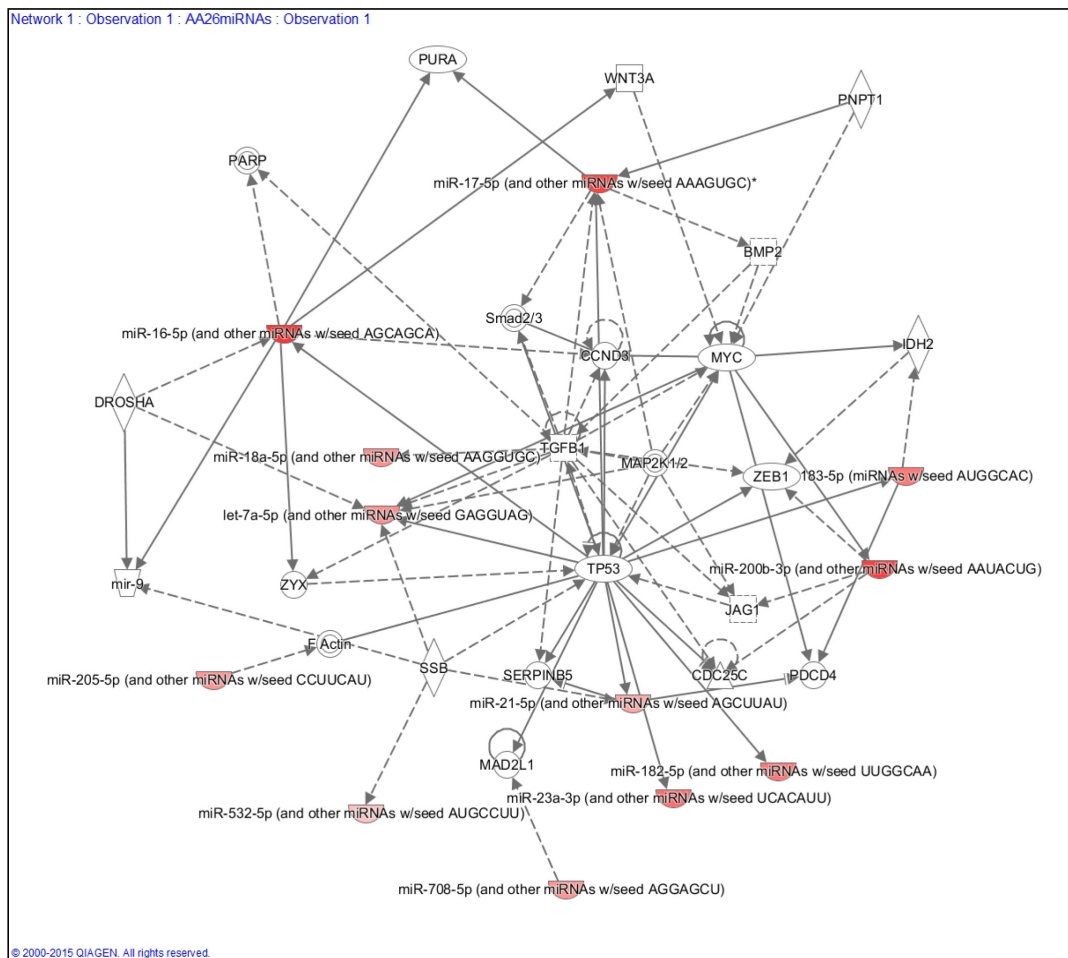

**Figure 8: Ingenuity Pathway Analysis (IPA) showing the main gene network interaction of 12 out of the 26 miRNA panel identified.**

**Table 4: Analysis of clinical-pathological parameters of the TNBC and non-TNBC cases in the AA and NHW groups of patients**

|                 | AA                     |                        |              | NHW                    |                        |                | AA and NHW  |            |
|-----------------|------------------------|------------------------|--------------|------------------------|------------------------|----------------|-------------|------------|
|                 | TNBC                   | Non-TNBC               | P value      | TNBC                   | Non-TNBC               | P value        | TNBC        | Non-TNBC   |
| Mean age (yrs)  | 50.74 ± 1.549, n = 27  | 57.41 ± 2.785, n = 27  | P = 0.0413*  | 53.70 ± 2.089, n = 30  | 53.93 ± 2.498, n = 30  | P = 0.4358     | P = 0.2687  | P = 0.3557 |
| Tumor size (cm) | 2.819 ± 0.3821, n = 26 | 2.800 ± 0.4553, n = 27 | P > 0.9999   | 2.964 ± 0.3074, n = 28 | 1.988 ± 0.2525, n = 26 | P = 0.0185*    | P = 0.7671  | P = 0.1291 |
| Tumor stage I   | 0                      | 11.5% (3/26)           | P = 0.0014** | 0                      | 27.3% (6/22)           | P = 0.0002***  | P = 1.0     | P = 0.3765 |
| Tumor stage II  | 11.1% (3/27)           | 46.2% (12/26)          |              | 10.3% (3/29)           | 36.35% (8/22)          |                |             |            |
| Tumor stage III | 88.9% (24/27)          | 42.3% (11/26)          |              | 89.7% (26/29)          | 36.35% (8/22)          |                |             |            |
| Tumor grade 1   | 0                      | 11.5% (3/26)           | P = 0.0085** | 0                      | 27.3% (6/22)           | P < 0.0001**** | P = 0.6633  |            |
| Tumor grade 2   | 11.5% (3/26)           | 38.5% (10/26)          |              | 7.1% (2/28)            | 36.35% (8/22)          |                |             |            |
| Tumor grade 3   | 88.5% (23/26)          | 50% (13/26)            |              | 92.9% (26/28)          | 36.35% (8/22)          |                |             |            |
| LN- positive    | 50% (13/26)            | 63.2% (12/19)          | P = 0.5446   | 38.5% (10/26)          | 56.3% (9/16)           | P = 0.3437     | P = 0.5771  | P = 0.7391 |
| LN- negative    | 50% (13/26)            | 36.8% (7/19)           |              | 61.5% (16/26)          | 43.7% (7/16)           |                |             |            |
| BC rec-positive | 33.3% (9/27)           | 11.1% (3/27)           | P = 0.0994   | 10.3% (3/29)           | 3.8% (1/26)            | P = 0.6131     | P = 0.0519* | P = 0.604  |
| BC rec-negative | 66.7% (18/27)          | 88.9% (24/27)          |              | 89.7% (26/29)          | 96.2% (25/26)          |                |             |            |
| DM-positive     | 25.9% (7/27)           | 19.2% (5/26)           | P = 0.7445   | 17.2% (5/29)           | 19.2% (5/26)           | P = 1.0        | P = 0.5225  | P = 1.0    |
| DM-negative     | 74.1% (20/27)          | 80.8% (21/26)          |              | 82.8% (24/29)          | 80.8% (21/26)          |                |             |            |

AA = African American, NHW = Non Hispanic Whites, TNBC = triple negative breast cancer, LN = Lymph Node, BC rec = Breast Cancer recurrence, DM = distant metastasis.

groups, are mapped in these locations (12p13, 1q32.2, 1q32.2, 8q23-24, and 13q31.3, 13q31.3 and 7q22.1, respectively). These miRNAs have been previously described with deregulated expression levels in breast cancer in association with cancer related pathways such as the ones involved in epithelial mesenchymal transition (EMT), cell migration, invasion and treatment resistance [30–33]. In addition, ROC curve analysis of the individual 26 miRNAs showed for 65.4% of these miRNAs a good discriminatory power in discriminating TNBC of AA and NHW patients. The ROC curve analysis of the combined miRNAs (AUC of 0.88) showed a superior power in discriminating these two populations, supporting the overall robustness of this panel. These results indicate that these 26 miRNAs are not randomly affected in TNBC, and may constitute significant differences in the biology of TNBC in these populations.

MiRNA expression levels have been demonstrated to vary according to ethnicity [13]. Several studies have shown the presence of genetic variants, mostly of single nucleotide polymorphisms (SNPs) in miRNA sites in association with the susceptibility risk of breast cancer in specific ethnic populations [14–19]. While in this study, we reported on “somatic” miRNA expression levels among the tumor tissue of the AA and NHW populations, which is not as frequently described, it is important to consider that the presence of these polymorphisms can modify miRNA expression, which could imply that some of the differences noted were not necessarily related to the tumor etiology, but rather to population stratification. Therefore, we queried the available miRNAs-SNPs databases (former HapMap [34], 1000 Genome Project [35]) and other reports on miRNA-SNPs in human populations [13, 15, 19], which include datasets of Lymphoblastoid cell lines (LCLs) derived from CEU (Utah residents with northern and western European

ancestry) and YRI (Yoruba people from Ibadan, Nigeria) [34] for the presence of these genetic variants, that could affect the expression of the miRNAs composing our panel in the populations studied. Although SNPs were reported enriched in the AA and/or White population in few of the miRNAs of our 26 miRNA panel, e.g. miR-183-5p, miR-661, they were mostly present in the seeding sequences of the miRNAs (3'UTR sequences), which could present a higher impact in the impairment of their interaction with their corresponding targets and functional activity, rather than their expression levels. We evaluated by qRT-PCR the miRNA expression of few miRNAs composing our panel, including the miR-661, in the normal breast tissue from a subset of the AA and NHW breast cancer patients of this study (data not shown) and did not observed the altered expression levels that was shown in the tumor, ruling out this possible polymorphism “effect” in their expression levels.

The pathway and function enrichment analysis of the 26 miRNAs differentially expressed in TNBC of AA and NHW of our study, confirmed their association with breast cancer tumorigenic processes, especially the ones that confer clinically aggressive tumor phenotypes, such as the ones in TNBC.

The miR-205-5p in particular, have been described down-regulated in the TNBC subtype, which is in alignment with its tumor suppressor role in the inhibition of proliferation, migration and invasion of cancer cells [36, 37]; others, as in our study, have reported its up-regulation, compatible with its oncogenic role in tumor initiation and proliferation [38]. Due to its differential expression in serum among cancer patients and healthy individuals, this miRNA has been considered a new biomarker for early detection of cancer [39, 40].

MiR-599 and miR-661, which were up-regulated in the TNBC cases of the AA group of this study, are

mapped in cytobands with high level of amplification, the 8q23-24 region, which is often associated with basal tumors that present with focal amplification of the *C-MYC* oncogene [41, 42]. Although this is a region frequently affected in breast cancer irrespective of the molecular subtype and ethnicity [20], it has been observed preferentially amplified in TNBC, including the ones that present *BRC1* mutations [43], which are frequently in AA women [44, 45].

Two clusters of miRNAs in our study were previously observed up-regulated in TNBC, with copy number directly influencing expression levels [25]; the cluster comprising miR-17-5p and miR-18a-5p, and the cluster of miR-93-5p, both located in 13q31.3, a commonly amplified genomic region in the TNBC of the AA patients. Targets of these miRNAs clusters are involved in gene networks associated with tumor aggressiveness, including the ones involving *PIK3CA*, *C-MYC* and *PTEN* genes [46–51]. In fact, the identification of the main pathways and gene networks affected by the corresponding miRNA targets of our 26 miRNA panel supported these reported findings. The neurotrophin signaling pathway was the one mostly affected, followed by the interconnected PI3K/AKT, MAPK kinase and insulin pathways. With the exception of three miRNAs, miR-548ad-3p, miR-614 and miR-4431, 23 miRNAs in our panel were involved in at least one of these pathways. Growth factors of the neurotrophin family and their receptors have been shown to be involved in breast cancer, affecting tumor cell growth and metastasis [52–54]. PI3K/AKT, MAPK kinase and insulin pathways are frequently described in breast cancer, which downstream targets control cell proliferation, cell survival and glucose metabolism [55].

The target pathways of our study were also among the most common ones observed in the TNBC cases of the TCGA and other studies [20, 56–58], with downstream genes involved in the *VEGF*, *C-MYC* and *PIK3* gene networks. In the TCGA study [20], the *PIK3* network presented with the highest levels of gene deregulations, involving critical downstream genes, such as *PTEN*, one of the most relevant mRNA targets of our 26 miRNA panel. In fact, our previous study of TNBC in Latina women, also suffering from TNBC disparities, showed a high frequency of *PTEN* loss (62%) in significant association with advanced tumor grades [59]. Interestingly, the insulin pathway, which has also been shown to be regulated by miRNAs [60], including the miR-1225-5p in our study [61], was among the top pathways of the differentially expressed miRNAs in the TNBC and non-TNBC subtypes of the AA patients, but not in the NHW group of patients. These findings are supported by previous reports showing differential expression of the Insulin Growth Factor (*IGF-1*) gene and its receptors in association with breast cancer subtypes and ethnicity [62, 63]. In AA patients in particular, alterations in this pathway and its downstream targets have been shown to contribute to the increased

risk of malignant transformation in young women and to confer more aggressive breast cancer subtypes [56–58]. Consistent with our findings, previous studies have shown that the transcriptional profile of the TNBC basal 1 subtype, which is often the most frequent TNBC subtype in AA [64], was associated with a low IGF1 signature score, a marker of high IGF1 receptor (IGF1R) expression and up regulation of the MAPK and AKT growth pathways [56]. A number of IGF1 receptor inhibitors are currently in preclinical and clinical trials [65, 66]; our and others data suggest that inhibitors of the IGF1 pathway may be a sensitive target in TNBC, particularly benefiting AA patients.

Interestingly, in our study, the insulin pathway was not specifically associated with the TNBC subtype in the AA patients, which indicates its relevance in the etiology of breast cancer in general in this population, which may be directly correlated with the high incidence of obesity and other co-morbidities, such as diabetes and other metabolic syndromes in this population [67]. Considering the critical role of the identified miRNAs in directing regulating targets associated with these co-morbidities, overall, these findings can form the basis to build a race specific genomic signature associated with co-morbidities, which can promote and augment prevention and intervention strategies, stratify and select appropriate patients for treatment and clinical trials and personalize cancer care.

In conclusion, we observed different patterns of miRNA expression in the TNBC of AA and NHW women in this study. The 26 miRNA panel observed in association with CNAs in the AA patients, presented a high power in discriminating TNBC between AA and NHW patients and affected critical cancer related gene networks and signaling pathways. These findings indicate that the mapping of the miRNAs in genomic regions with high levels of CNAs of this study was not merely physical, but biologically relevant to the TNBC genome of AA patients. The validation of this 26 miRNA panel in independent and larger samples sets from these ethnic groups is required to ensure that their expression patterns are reflected across populations and are not unique to a particular cohort of patients. The future determination of their functional regulatory role in conferring the aggressive TNBC phenotype, including early development of metastasis and drug resistance, can open new opportunities to develop novel therapeutic targets for TNBC, holding promises towards the improvement of the overall survival rate of AA women with TNBC.

## MATERIALS AND METHODS

### General study design

Genome-wide miRNA profiling was performed in TNBC and non-TNBC cases from AA and NHW



patients. The array-CGH analysis performed in the same TNBC specimens of the AA patients was associated with the miRNA expression profiling data as presented in the workflow of Figure 1. ROC analysis was performed to determine the individual discriminatory power of the identified panel of miRNAs in the TNBC of the studied populations. The identified miRNAs and corresponding targets were then biologically selected for their relevance in the breast cancer/TNBC phenotype by applying a comprehensive computational analysis using combinatorial target prediction algorithms in conjunction with Gene Ontology and pathway enrichment analysis. Finally association with clinical-pathological data from the patients was performed.

### Patient accrual and sample collection

Formalin-fixed paraffin-embedded (FFPE) tumor sections were obtained from 27 and 30 cases of TNBC from AA and NHW breast cancer patients, respectively, from patients that undergone primary surgery for tumor removal, prior to any treatment, at the MedStar Georgetown Hospital, Washington DC. Tumors with a non-TNBC subtype were also obtained from both groups in the same number of patients: 27 non-TNBC from AA and 30 non-TNBC cases from NHW patients. Altogether 54 AA and 60 NHW patients were evaluated in this study. All the samples were procured from the patients (from all groups of tumors (TNBC and non-TNBC) and ethnic groups (AA and NHW) under informed consent, performed by the personal from Non-Therapeutic Shared Resource (NTSR) of Lombardi Comprehensive Cancer Center according to their establish SOP. The specimens were received de-codified, with no patient identifiers, under the Histopathology Tissue Shared Resources (HTSR)-IRB approved protocol (IRB#1992-048).

Clinical and pathological information was retrieved by the HTSR personnel and included: age at diagnosis, tumor size, stage and grade, and presence of lymph node metastasis. Breast cancer recurrence and distant metastasis status were also obtained with a follow-up period that varied from 2 to 9 years (Table 4). The analyzed breast cancer tissues were from primary tumor lesions, obtained prior to any cancer treatment, at the time of the surgery. The classification of the breast cancer TNBC and non-TNBC phenotype was determined by the three IHC surrogate markers ER, PR and HER2, following the American Society of Clinical Oncology (ASCO)/College of American Pathology (CAP) guidelines [68,69]. In the non-TNBC group, 65% of the cases were ER+/PR+/HER2-, followed by 19% of ER+/PR+/HER2+, when combining AA and NHW patients. Prior to the genomic analysis all of the tumor tissues were inspected for the presence of > 80% of tumor cells followed by microdissection according to a previous protocol [70].

### Ancestral markers analysis

Ethnicity information was primarily obtained from self-reported patients' records. To obtain a genomic based information and assess ancestry we genotyped a subset of patients (13 AA and 14 NHW) using SNP chip Illumina Infinium QC Array (Illumina Inc., CA), which contains 15,949 markers (including ~3,000 ancestral informative markers (AIMs)). The genotype calling was performed using GenomeStudio Software v. 2011.1 using the default settings. SNPs with MAF  $\leq 0.01$  were excluded from analysis. Further, we merged our dataset with the 1000 Genomes Project phase 1 ( $n=1,902$  samples) [71], which present an overlap of 14,718 variants between ours and these data sets. Finally, we performed Principal Components Analysis (PCA) using PLINK 1.9 [72], which uses the EIGENSTRAT method [73] to calculate model ancestry differences between different samples. Based on the result of PC1 and PC2 we were able to differentiate the two main population groups (European (EUR) and African (AFR) in our samples confirming the self-report ethnicity information (Supplementary Figure S2).

### MiRNA analysis

MiRNA expression analysis was performed using the Human v2 miRNA Expression Assay from NanoString nCounter Technology (Seattle, WA, USA), that contains 800 human probes derived from miRBase v.18. The raw data was pre-processed by NanoString's nCounter RCC collector and the miRNAs were normalized using the geometric mean. Unsupervised and supervised hierarchical cluster analysis was performed on miRNAs that were found to be significantly differentially expressed ( $P < 0.01$ , FDR  $< 0.05$ ), using Pearson's correlation coefficient and average linkage by using the Multiexperiment Viewer software (MeV 4.9.0). Fold changes, represented on the log2 scale ( $\log_2FC$ ), were calculated for all differentially expressed miRNAs.

### Array-CGH analysis

DNA copy number analysis was performed using an oligonucleotide array-CGH platform (SurePrint G3 Human CGH Microarray 8x60K; Agilent Technologies Inc., Santa Clara, CA), according to the protocol for FFPE samples that we have established in our lab [70]. DNA was isolated from consecutive FFPE sections of the cases profiled for miRNA. DNA isolated from peripheral blood from multiple normal individuals was used as control DNA. The array data was analyzed using the Feature Extraction (FE) v.10.10 and Agilent CGH Analytics v.7.0 software (Agilent Technologies Inc., Santa Clara, CA), using the ADM-2 algorithm, threshold 6.0 and an aberration filter with a minimum number  $> 3$  probes. Gene amplifications and deletions were defined as minimum average absolute

log<sub>2</sub> ratio (intensity of the Cy5 dye (reference DNA)/intensity of the Cy3 dye (test DNA) value of > 0.25 and <-0.25, respectively, as per the CGH analytics analysis.

### **Association of miRNA expression levels and copy number alterations (CNAs)**

To determine the potential association of miRNA expression levels and CNAs, we integrated the miRNA and copy number data that was performed in the same TNBC tissue specimens of the AA patients. Initially, the genomic location of each miRNA differentially expressed between the TNBC of AA and NHW patients was assessed at the miRbase.org and determined whether they were mapped at the most commonly affected cytobands (CNAs present in  $\geq 33\%$  of the cases). Next, it was determined whether the miRNAs residing in these cytobands presented the corresponding changes in expression levels (i.e. cytoband with copy number gain/up-regulated miRNA expression and cytoband with copy number loss/down-regulated miRNA expression). A second integration approach was to determine the common gene targets that may be affected by both CNAs and miRNA expression alterations. For this approach, gene targets were queried using the available miRNA target databases and integrated with the genes located in the most commonly cytobands above. Only miRNA target genes that were present in two out of the three miRNA databases were selected. Considering that one miRNA can target several different genes irrespectively of their genomic location, all of the most frequently affected cytobands (present in at least 33% of the TNBC-AA cases) were included in this analysis.

### **Receiver operating characteristic (ROC) curve analysis**

The ability of the identified 26 miRNA panel to discriminate between AA-TNBC and NHW-TNBC was examined by constructing receiver operating characteristic (ROC) curves and calculating the area under the curve (AUC). Sensitivity was plotted against 1-specificity for the binary classifier (AA-TNBC and NHW-TNBC). An AUC of 100% denotes perfect discrimination by the miRNA, whereas an AUC of 50% denotes complete lack of discrimination by the miRNA. AUCs and 95% corresponding confidence intervals were calculated for each miRNA.

### **Biological function and pathway analysis**

The targeted pathways of the identified miRNAs were determined by DIANA miRPath v.2.0 software [74]. A detailed functional analysis to identify miRNA-mediated, cancer-related and statistically significant networks, biological functions and canonical signaling pathways for both differentially expressed miRNAs and

target genes was performed by Ingenuity Pathway Analysis System (IPA v.8.5, Ingenuity Systems, Edwood, CA).

### **Analysis of clinical-pathological variables of the TNBC and non-TNBC of AA and NHW patients**

The Student *t* test was used to analyze the differences of the mean age at diagnosis and tumor size in the TNBC and non-TNBC cases within and between the patient groups. The Chi-square ( $\chi^2$ ) test was used to evaluate tumor stage and grade and the Fisher Exact test was used to evaluate lymph node, local recurrence, and distant metastasis status in both tumor subtypes. Significance level was considered to be  $P < 0.05$ . For the 26 miRNAs that were selected from the integration with the array-CGH data, linear regression models were considered having the transformed miRNA values as the outcomes and ethnicity, age, tumor size, and lymph node status as the regressors. For each of the clinical-pathological parameters (age, tumor size, lymph node status), a significance level of FDR < 0.05 using the Benjamin and Hochberg FDR control method [75] was considered. Tumor stage and grade were not considered since none of the AA and NHW patients with the TNBC subtype showed tumors with stage I and grade 1.

### **ACKNOWLEDGMENTS**

The authors thank Dr. Deborah Berry and Krysta Chaldeckas from The Histopathology and Tissue Shared Resource (HTSR) of Lombardi Comprehensive Cancer Center (LCCC) for assistance with specimen collection and Dr. Janice Rone for the careful reading of the manuscript and language revision. We are also in debt with Dr. Ira Shoulson and Erin Wilhelm, principal investigator and executive director, respectively, of the Georgetown University Center of Excellence in Regulatory Science and Innovation (CERSI) program.

### **CONFLICTS OF INTEREST**

All the authors declare no conflicts of interest.

### **FINANCIAL SUPPORT**

This research was supported by the Georgetown University Center of Excellence in Regulatory Science and Innovation (CERSI; U01FD004319), a collaborative effort between the University and the U.S. Food and Drug Administration to promote regulatory science through innovative research and education. This research does not necessarily reflect the views of the FDA. Scholarship to B.S. was provided by Coordenação de Aperfeiçoamento de Pessoal de Nível Superior (CAPES) and to K.R. by the Susan G. Komen Post Baccalaureate Training in Breast Cancer Health (PBTDR12228366). The Histopathology

and Tissue Shared Resource (HTSR) and Genomics and Epigenomics Shared Resource of the Lombardi Comprehensive Cancer Center (LCCC), partially supported by the NIH/NCI grant P30-CA051008, were utilized in this study.

## REFERENCES

1. Foulkes WD, Smith IE, Reis-Filho JS. Triple-negative breast cancer. *N Engl J Med.* 2010; 363:1938–1948.
2. Pal SK, Childs BH, Pegram M. Triple negative breast cancer: unmet medical needs. *Breast Cancer Res Treat.* 2011; 125:627–636.
3. Crown J, O’Shaughnessy J, Gullo G. Emerging targeted therapies in triple-negative breast cancer. *Ann. Oncol.* 2012; 23:vi56–65.
4. Kohler BA, Sherman RL, Howlader N, Jemal A, Ryerson AB, Henry KA, Boscoe FP, Cronin KA, Lake A, Noone AM, Henley SJ, Ehemann CR, Anderson RN, et al. Annual Report to the Nation on the Status of Cancer, 1975–2011, Featuring Incidence of Breast Cancer Subtypes by Race/Ethnicity, Poverty, and State. *J Natl Cancer Inst.* 2015; 107:djv048.
5. Tao L, Gomez SL, Keegan TH, Kurian AW, Clarke CA. Breast Cancer Mortality in African-American and Non-Hispanic White Women by Molecular Subtype and Stage at Diagnosis: A Population-Based Study. *Cancer Epidemiol Biomarkers Prev.* 2015; 24:1039–1045.
6. Loo LW, Wang Y, Flynn EM, Lund MJ, Bowles EJ, Buist DS, Liff JM, Flagg EW, Coates RJ, Eley JW, Hsu L, Porter PL. Genome-wide copy number alterations in subtypes of invasive breast cancers in young white and African American women. *Breast Cancer Res Treat.* 2011; 127:297–308.
7. Grunda JM, Steg AD, He Q, Steciuk MR, Byan-Parker S, Johnson MR, Grizzle WE. Differential expression of breast cancer-associated genes between stage- and age-matched tumor specimens from African- and Caucasian-American Women diagnosed with breast cancer. *BMC Res Notes.* 2012; 5:248.
8. Sturtz LA, Melley J, Mamula K, Shriver CD, Ellsworth RE. Outcome disparities in African American women with triple negative breast cancer: a comparison of epidemiological and molecular factors between African American and Caucasian women with triple negative breast cancer. *BMC cancer.* 2014; 14:62.
9. Dietze EC, Sistrunk C, Miranda-Carboni G, O’Regan R, Seewaldt VL. Triple-negative breast cancer in African-American women: disparities versus biology. *Nat Rev Cancer.* 2015; 15:248–254.
10. Takahashi RU, Miyazaki H, Ochiya T. The Roles of MicroRNAs in Breast Cancer. *Cancers.* 2015; 7:598–616.
11. Yang F, Zhang W, Shen Y, Guan X. Identification of dysregulated microRNAs in triple-negative breast cancer (review). *Int J Oncol.* 2015; 46:927–932.
12. Riaz M, van Jaarsveld MT, Hollestelle A, Prager-van der Smissen WJ, Heine AA, Boersma AW, Liu J, Helmijs J, Ozturk B, Smid M, Wiemer EA, Foekens JA, Martens JW. miRNA expression profiling of 51 human breast cancer cell lines reveals subtype and driver mutation-specific miRNAs. *Breast Cancer Res.* 2013; 15:R33.
13. Rawlings-Goss RA, Campbell MC, Tishkoff SA. Global population-specific variation in miRNA associated with cancer risk and clinical biomarkers. *BMC Med Genomics.* 2014; 7:53.
14. Pelletier C, Weidhaas JB. MicroRNA binding site polymorphisms as biomarkers of cancer risk. *Expert Rev Mol Diagn.* 2010; 10:817–829.
15. Huang RS, Gamazon ER, Ziliak D, Wen Y, Im HK, Zhang W, Wing C, Duan S, Bleibel WK, Cox NJ, Dolan ME. Population differences in microRNA expression and biological implications. *RNA Biol.* 2011; 8:692–701.
16. Bensen JT, Tse CK, Nyante SJ, Barnholtz-Sloan JS, Cole SR, Millikan RC. Association of germline microRNA SNPs in pre-miRNA flanking region and breast cancer risk and survival: the Carolina Breast Cancer Study. *Cancer Causes Control.* 2013; 24:1099–1109.
17. Yao S, Graham K, Shen J, Campbell LE, Singh P, Zirpoli G, Roberts M, Ciupak G, Davis W, Hwang H, Khoury T, Bovbjerg DH, Jandorf L, et al. Genetic variants in microRNAs and breast cancer risk in African American and European American women. *Breast Cancer Res Treat.* 2013; 141:447–459.
18. Toyama T, Kondo N, Endo Y, Sugiura H, Yoshimoto N, Iwasa M, Takahashi S, Fujii Y, Yamashita H. High expression of microRNA-210 is an independent factor indicating a poor prognosis in Japanese triple-negative breast cancer patients. *Jpn J Clin Oncol.* 2012; 42:256–263.
19. Khan S, Greco D, Michailidou K, Milne RL, Muranen TA, Heikkinen T, Aaltonen K, Dennis J, Bolla MK, Liu J, Hall P, Irwanto A, Humphreys K, et al. MicroRNA related polymorphisms and breast cancer risk. *PLoS one.* 2014; 9:e109973.
20. Comprehensive molecular portraits of human breast tumours. *Nature.* 2012; 490:61–70.
21. Kristensen VN, Lingjaerde OC, Russnes HG, Vollan HK, Frigessi A, Borresen-Dale AL. Principles and methods of integrative genomic analyses in cancer. *Nat Rev Cancer.* 2014; 14:299–313.
22. Calin GA, Sevignani C, Dumitru CD, Hyslop T, Noch E, Yendamuri S, Shimizu M, Rattan S, Bullrich F, Negrini M, Croce CM. Human microRNA genes are frequently located at fragile sites and genomic regions involved in cancers. *Proc Natl Acad Sci USA.* 2004; 101:2999–3004.
23. Zhang L, Huang J, Yang N, Greshock J, Megraw MS, Giannakakis A, Liang S, Naylor TL, Barchetti A, Ward MR, Yao G, Medina A, O’Brien-Jenkins A, et al. microRNAs exhibit high frequency genomic alterations in human cancer. *Proc Natl Acad Sci USA.* 2006; 103:9136–9141.



24. Selcuklu SD, Yakicier MC, Erson AE. An investigation of microRNAs mapping to breast cancer related genomic gain and loss regions. *Cancer Genet Cytogenet.* 2009; 189:15–23.
25. de Rinaldis E, Gazinska P, Mera A, Modrusan Z, Fedorowicz GM, Burford B, Gillett C, Marra P, Grigoriadis A, Dorman D, Holmberg L, Pinder S, Tutt A. Integrated genomic analysis of triple-negative breast cancers reveals novel microRNAs associated with clinical and molecular phenotypes and sheds light on the pathways they control. *BMC Genomics.* 2013; 14:643.
26. Cava C, Bertoli G, Ripamonti M, Mauri G, Zoppis I, Della Rosa PA, Gilardi MC, Castiglioni I. Integration of mRNA expression profile, copy number alterations, and microRNA expression levels in breast cancer to improve grade definition. *PloS one.* 2014; 9:e97681.
27. Li D, Xia H, Li ZY, Hua L, Li L. Identification of Novel Breast Cancer Subtype-Specific Biomarkers by Integrating Genomics Analysis of DNA Copy Number Aberrations and miRNA-mRNA Dual Expression Profiling. *BioMed Res Int.* 2015; 2015:746970.
28. Iorio MV, Croce CM. Causes and consequences of microRNA dysregulation. *Cancer J.* 2012; 18:215–222.
29. Shah SP, Roth A, Goya R, Oloumi A, Ha G, Zhao Y, Turashvili G, Ding J, Tse K, Haffari G, Bashashati A, Prentice LM, Khattra J, et al. The clonal and mutational evolution spectrum of primary triple-negative breast cancers. *Nature.* 2012; 486:395–399.
30. Korpala M, Lee ES, Hu G, Kang Y. The miR-200 family inhibits epithelial-mesenchymal transition and cancer cell migration by direct targeting of E-cadherin transcriptional repressors ZEB1 and ZEB2. *J Biol Chem.* 2008; 283:14910–14914.
31. Chen J, Tian W, Cai H, He H, Deng Y. Down-regulation of microRNA-200c is associated with drug resistance in human breast cancer. *Med Oncol.* 2012; 29:2527–2534.
32. Humphries B, Yang C. The microRNA-200 family: small molecules with novel roles in cancer development, progression and therapy. *Oncotarget.* 2015; 6:6472–6498. doi: 10.18632/oncotarget.3052.
33. Vosgha H, Salajegheh A, Smith RA, Lam AK. The important roles of miR-205 in normal physiology, cancers and as a potential therapeutic target. *Curr Cancer Drug Tar.* 2014; 14:621–637.
34. The International HapMap Project. *Nature.* 2003; 426:789–796.
35. Auton A, Brooks LD, Durbin RM, Garrison EP, Kang HM, Korbel JO, Marchini JL, McCarthy S, McVean GA, Abecasis GR. A global reference for human genetic variation. *Nature.* 2015; 526:68–74.
36. Qin AY, Zhang XW, Liu L, Yu JP, Li H, Wang SZ, Ren XB, Cao S. MiR-205 in cancer: an angel or a devil? *Eur J Cell Biol.* 2013; 92:54–60.
37. Su CM, Lee WH, Wu AT, Lin YK, Wang LS, Wu CH, Yeh CT. Pterostilbene inhibits triple-negative breast cancer metastasis via inducing microRNA-205 expression and negatively modulates epithelial-to-mesenchymal transition. *J Nutr Biochem.* 2015; 26:675–685.
38. Piovon C, Palmieri D, Di Leva G, Braccioli L, Casalini P, Nuovo G, Tortoreto M, Sasso M, Plantamura I, Triulzi T, Taccioli C, Tagliabue E, Iorio MV, et al. Oncosuppressive role of p53-induced miR-205 in triple negative breast cancer. *Mol Oncol.* 2012; 6:458–472.
39. Zhang H, Li B, Zhao H, Chang J. The expression and clinical significance of serum miR-205 for breast cancer and its role in detection of human cancers. *Int J Clin Exp Med.* 2015; 8:3034–3043.
40. Halvorsen AR, Bjaanaes M, LeBlanc M, Holm AM, Bolstad N, Rubio L, Penalver JC, Cervera J, Mojarrieta JC, Lopez-Guerrero JA, Brustugun OT, Helland A. A unique set of 6 circulating microRNAs for early detection of non-small cell lung cancer. *Oncotarget.* 2016; 7:37250–59. doi: 10.18632/oncotarget.9363.
41. Vetter G, Saumet A, Moes M, Vallar L, Le Behec A, Laurini C, Sabbah M, Arar K, Theillet C, Lecellier CH, Friederich E. miR-661 expression in SNAI1-induced epithelial to mesenchymal transition contributes to breast cancer cell invasion by targeting Nectin-1 and StarD10 messengers. *Oncogene.* 2010; 29:4436–4448.
42. Hoffman Y, Bublik DR, Pilpel Y, Oren M. miR-661 downregulates both Mdm2 and Mdm4 to activate p53. *Cell Death Differ.* 2014; 21:302–309.
43. Toffoli S, Bar I, Abdel-Sater F, Delree P, Hilbert P, Cavallin F, Moreau F, Van Criekinge W, Lacroix-Triki M, Campone M, Martin AL, Roche H, Machiels JP, et al. Identification by array comparative genomic hybridization of a new amplicon on chromosome 17q highly recurrent in BRCA1 mutated triple negative breast cancer. *Breast Cancer Res.* 2014; 16:466.
44. Churpek JE, Walsh T, Zheng Y, Moton Z, Thornton AM, Lee MK, Casadei S, Watts A, Neistadt B, Churpek MM, Huo D, Zvosec C, Liu F, et al. Inherited predisposition to breast cancer among African American women. *Breast Cancer Res Treat.* 2015; 149:31–39.
45. Zhang J, Fackenthal JD, Zheng Y, Huo D, Hou N, Niu Q, Zvosec C, Ogundiran TO, Hennis AJ, Leske MC, Nemesure B, Wu SY, Olopade OI. Recurrent BRCA1 and BRCA2 mutations in breast cancer patients of African ancestry. *Breast Cancer Res Treat.* 2012; 134:889–894.
46. Aguda BD, Kim Y, Piper-Hunter MG, Friedman A, Marsh CB. MicroRNA regulation of a cancer network: consequences of the feedback loops involving miR-17-92, E2F, and Myc. *Proc Natl Acad Sci USA.* 2008; 105:19678–19683.
47. Petrocca F, Vecchione A, Croce CM. Emerging role of miR-106b-25/miR-17-92 clusters in the control of transforming growth factor beta signaling. *Cancer Res.* 2008; 68:8191–8194.
48. Fu X, Tian J, Zhang L, Chen Y, Hao Q. Involvement of microRNA-93, a new regulator of PTEN/Akt signaling pathway, in regulation of chemotherapeutic drug cisplatin chemosensitivity in ovarian cancer cells. *FEBS Lett.* 2012; 586:1279–1286.



49. Jiang L, Wang C, Lei F, Zhang L, Zhang X, Liu A, Wu G, Zhu J, Song L. miR-93 promotes cell proliferation in gliomas through activation of PI3K/Akt signaling pathway. *Oncotarget*. 2015; 6:8286–8299. doi: 10.18632/oncotarget.3221.
50. Ohta K, Hoshino H, Wang J, Ono S, Iida Y, Hata K, Huang SK, Colquhoun S, Hoon DS. MicroRNA-93 activates c-Met/PI3K/Akt pathway activity in hepatocellular carcinoma by directly inhibiting PTEN and CDKN1A. *Oncotarget*. 2015; 6:3211–3224. doi: 10.18632/oncotarget.3085.
51. Ren J, Jin F, Yu Z, Zhao L, Wang L, Bai X, Zhao H, Yao W, Mi X, Wang E, Olopade OI, Wei M. MYC overexpression and poor prognosis in sporadic breast cancer with BRCA1 deficiency. *Tumour Biol*. 2013; 34:3945–3958.
52. Hondermarck H. Neurotrophins and their receptors in breast cancer. *Cytokine Growth Factor Rev*. 2012; 23:357–365.
53. Momeny M, Saunus JM, Marturana F, McCart Reed AE, Black D, Sala G, Iacobelli S, Holland JD, Yu D, Da Silva L, Simpson PT, Khanna KK, Chenevix-Trench G, et al. Heregulin-HER3-HER2 signaling promotes matrix metalloproteinase-dependent blood-brain-barrier transendothelial migration of human breast cancer cell lines. *Oncotarget*. 2015; 6:3932–3946. doi: 10.18632/oncotarget.2846.
54. De la Cruz-Morcillo MA, Berger J, Sanchez-Prieto R, Saada S, Naves T, Guillaudeau A, Perraud A, Sindou P, Lacroix A, Descazeaud A, Lalloue F, Jauberteau MO. p75 neurotrophin receptor and pro-BDNF promote cell survival and migration in clear cell renal cell carcinoma. *Oncotarget*. 2016; 7:34480–97. doi: 10.18632/oncotarget.8911.
55. Cossu-Rocca P, Orru S, Muroli MR, Sanges F, Sotgiu G, Ena S, Pira G, Murgia L, Manca A, Uras MG, Sarobba MG, Urru S, De Miglio MR. Analysis of PIK3CA Mutations and Activation Pathways in Triple Negative Breast Cancer. *PLoS one*. 2015; 10:e0141763.
56. Stewart PA, Luks J, Roycik MD, Sang QX, Zhang J. Differentially expressed transcripts and dysregulated signaling pathways and networks in African American breast cancer. *PLoS one*. 2013; 8:e82460.
57. Keenan T, Moy B, Mroz EA, Ross K, Niemierko A, Rocco JW, Isakoff S, Ellisen LW, Bardia A. Comparison of the Genomic Landscape Between Primary Breast Cancer in African American Versus White Women and the Association of Racial Differences With Tumor Recurrence. *J Clin Oncol*. 2015; 33:3621–3627.
58. Haddad SA, Lunetta KL, Ruiz-Narvaez EA, Bensen JT, Hong CC, Sucheston-Campbell LE, Yao S, Bandera EV, Rosenberg L, Haiman CA, Troester MA, Ambrosone CB, Palmer JR. Hormone-related pathways and risk of breast cancer subtypes in African American women. *Breast Cancer Res Treat*. 2015; 154:145–154.
59. Oliveira MC, Pereira SR, Ribeiro EMF, Lima RS, Urban CA, Sebastião APM, Marian C, Haddad BR, Cavalli IJ, Cavalli LR. DNA copy number changes in the PI3K signaling pathway genes in triple negative breast cancer. *Cancer Res*. 2011; 71.
60. Jung HJ, Suh Y. Regulation of IGF -1 signaling by microRNAs. *Frontiers in genetics*. 2014; 5:472.
61. Zheng H, Zhang F, Lin X, Huang C, Zhang Y, Li Y, Lin J, Chen W. MicroRNA-1225-5p inhibits proliferation and metastasis of gastric carcinoma through repressing insulin receptor substrate-1 and activation of beta-catenin signaling. *Oncotarget*. 2016; 7:4647–4663. doi: 10.18632/oncotarget.6615.
62. Christopoulos PF, Msaouel P, Koutsilieris M. The role of the insulin-like growth factor-1 system in breast cancer. *Mol Cancer*. 2015; 14:43.
63. Fowke JH, Matthews CE, Yu H, Cai Q, Cohen S, Buchowski MS, Zheng W, Blot WJ. Racial differences in the association between body mass index and serum IGF1, IGF2, and IGFBP3. *Endocr Relat Cancer*. 2010; 17:51–60.
64. Lindner R, Sullivan C, Offor O, Lezon-Geyda K, Halligan K, Fischbach N, Shah M, Bossuyt V, Schulz V, Tuck DP, Harris LN. Molecular phenotypes in triple negative breast cancer from African American patients suggest targets for therapy. *PLoS one*. 2013; 8:e71915.
65. Mu L, Tuck D, Katsaros D, Lu L, Schulz V, Perincheri S, Menato G, Scarampi L, Harris L, Yu H. Favorable outcome associated with an IGF-1 ligand signature in breast cancer. *Breast Cancer Res Treat*. 2012; 133:321–331.
66. Arcaro A. Targeting the insulin-like growth factor-1 receptor in human cancer. *Front Pharmacol*. 2013; 4:30.
67. Ashing K, Rosales M, Lai L, Hurria A. Occurrence of comorbidities among African-American and Latina breast cancer survivors. *J Cancer Surviv*. 2014; 8:312–318.
68. Hammond ME, Hayes DF, Dowsett M, Allred DC, Hagerty KL, Badve S, Fitzgibbons PL, Francis G, Goldstein NS, Hayes M, Hicks DG, Lester S, Love R, et al. American Society of Clinical Oncology/College Of American Pathologists guideline recommendations for immunohistochemical testing of estrogen and progesterone receptors in breast cancer. *J Clin Oncol*. 2010; 28:2784–2795.
69. Wolff AC, Hammond ME, Hicks DG, Dowsett M, McShane LM, Allison KH, Allred DC, Bartlett JM, Bilous M, Fitzgibbons P, Hanna W, Jenkins RB, Mangu PB, et al. Recommendations for human epidermal growth factor receptor 2 testing in breast cancer: American Society of Clinical Oncology/College of American Pathologists clinical practice guideline update. *Arch Pathol Lab Med*. 2014; 138:241–256.
70. Torresan C, Oliveira MM, Pereira SR, Ribeiro EM, Marian C, Gusev Y, Lima RS, Urban CA, Berg PE, Haddad BR, Cavalli IJ, Cavalli LR. Increased copy number of the DLX4 homeobox gene in breast axillary lymph node metastasis. *Cancer Genet*. 2014; 207:177–187.
71. Abecasis GR, Auton A, Brooks LD, DePristo MA, Durbin RM, Handsaker RE, Kang HM, Marth GT, McVean GA. An integrated map of genetic variation from 1,092 human genomes. *Nature*. 2012; 491:56–65.
72. Chang CC, Chow CC, Tellier LC, Vattikuti S, Purcell SM, Lee JJ. Second-generation PLINK: rising to the challenge of larger and richer datasets. *GigaScience*. 2015; 4:7.

73. Patterson N, Price AL, Reich D. Population structure and eigenanalysis. *PLoS genetics*. 2006; 2:e190.
74. Vlachos IS, Kostoulas N, Vergoulis T, Georgakilas G, Reczko M, Maragkakis M, Paraskevopoulou MD, Prionidis K, Dalamagas T, Hatzigeorgiou AG. DIANA miRPath v.2.0: investigating the combinatorial effect of microRNAs in pathways. *Nucleic Acids Res*. 2012; 40:W498–504.
75. Benjamini Y, Hochberg Y. Controlling the false discovery rate: a practical and powerful approach to multiple testing. *J R Stat Soc Series B*. 1995:289–300.
