# Supplementary material for: Differentially expressed miRNAs in triple negative breast cancer between African-American and non-Hispanic white women
Source: PubMed Central journal article supplement (PMC5346713; doi:10.18632/oncotarget.13024), 2016-11-02
Supplement: oncotarget-07-79274-s001.pdf [file oncotarget-07-79274-s001.pdf]

# Differentially expressed miRNAs in triple negative breast cancer between African-American and non-Hispanic white women

## Supplementary Materials

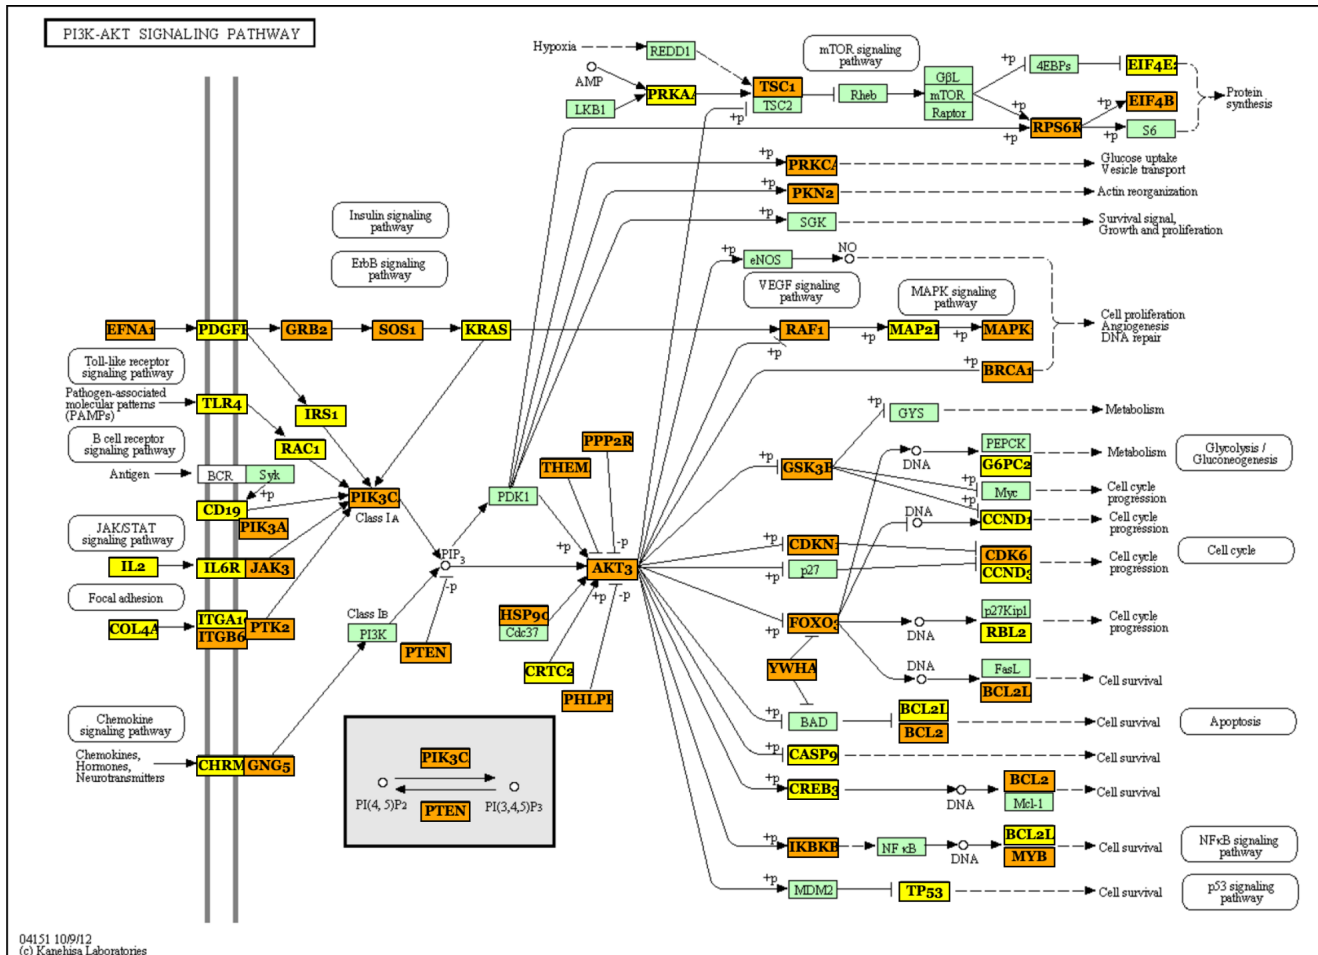

**Supplementary Figure S1: PIK3-AKT and other signaling related pathways affected by the 26 miRNAs of our panel (DIANA miRPath v.2.0).** White boxes indicate gene entries in non-metabolic pathways or enzyme and reaction entries in metabolic pathways (Reference Pathway). Green boxes indicate presence of the gene in the genome (Organism-specific pathway). Yellow boxes indicate genes targeted by one miRNA. Orange boxes indicate genes targeted by two or more miRNAs.

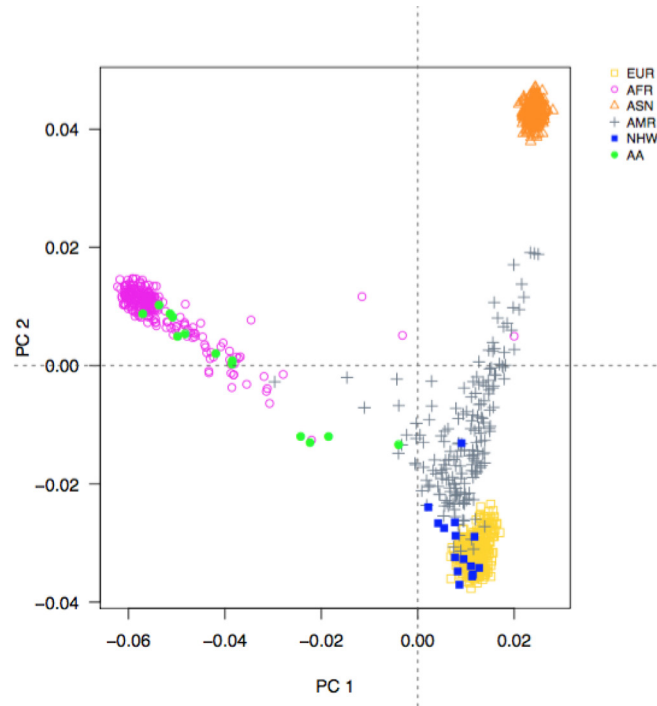

**Supplementary Figure S2: Principal component analysis (PCA) showing that a subset genotype dataset of African American (AA) and Non-Hispanic White (NHW) patients of this study, distinctly clustered with the European (EUR) and African (AFR) main ethnic groups from the 1000 Genome Project (phase 1). ASN: East Asian, AMR: Latin American.**

**Supplementary Table S1: Top 15 miRNAs (based on log<sub>2</sub>FC) observed up- and down-regulated in the TNBC subtype in comparison to the non-TNBC subtype of the AA group of patients**

| MiRNAs up-regulated | Log <sub>2</sub> FC | P-value  | FDR         | MiRNAs down-regulated | Log <sub>2</sub> FC | P-value  | FDR         |
|---------------------|---------------------|----------|-------------|-----------------------|---------------------|----------|-------------|
| hsa-miR-384         | 2.559               | 4.05E-05 | 7.20E-04    | hsa-miR-497-5p        | -4.079              | 1.89E-08 | 1.51E-05    |
| hsa-miR-135b-5p     | 2.360               | 9.31E-04 | 0.004433157 | hsa-miR-145-5p        | -3.251              | 1.28E-06 | 1.28E-04    |
| hsa-miR-1277-3p     | 2.358               | 5.79E-05 | 8.91E-04    | hsa-miR-29c-3p        | -3.105              | 1.75E-07 | 7.00E-05    |
| hsa-miR-1185-5p     | 2.304               | 7.74E-06 | 3.10E-04    | hsa-miR-143-3p        | -3.036              | 1.47E-06 | 1.31E-04    |
| hsa-miR-626         | 2.245               | 2.08E-06 | 1.19E-04    | hsa-miR-26a-5p        | -2.976              | 3.20E-06 | 1.70E-04    |
| hsa-miR-219-5p      | 2.194               | 7.87E-06 | 3.00E-04    | hsa-miR-1253          | -2.879              | 4.51E-04 | 0.0027133   |
| hsa-miR-576-5p      | 2.190               | 1.69E-06 | 1.23E-04    | hsa-miR-199b-5p       | -2.825              | 1.65E-06 | 1.32E-04    |
| hsa-miR-606         | 2.164               | 2.79E-07 | 7.43E-05    | hsa-miR-342-3p        | -2.785              | 4.42E-07 | 7.07E-05    |
| hsa-miR-499a-3p     | 2.132               | 4.86E-05 | 7.94E-04    | hsa-miR-1290          | -2.763              | 7.36E-06 | 3.10E-04    |
| hsa-miR-548a1       | 2.093               | 8.52E-06 | 2.96E-04    | hsa-miR-29b-3p        | -2.742              | 8.27E-05 | 0.001050187 |
| hsa-miR-522-3p      | 2.091               | 1.72E-06 | 1.15E-04    | hsa-miR-30a-5p        | -2.720              | 1.41E-04 | 0.001429822 |
| hsa-miR-516a-5p     | 2.029               | 7.06E-05 | 9.57E-04    | hsa-miR-196a-5p       | -2.668              | 4.62E-05 | 7.69E-04    |
| hsa-miR-659-3p      | 2.020               | 4.01E-05 | 7.29E-04    | hsa-miR-195-5p        | -2.631              | 3.72E-07 | 7.45E-05    |
| hsa-miR-568         | 2.016               | 1.43E-05 | 4.08E-04    | hsa-miR-451a          | -2.613              | 8.64E-05 | 0.001063546 |
| hsa-miR-518c-3p     | 1.993               | 1.91E-05 | 4.50E-04    | hsa-miR-30b-5p        | -2.555              | 3.15E-05 | 6.45E-04    |

FC = fold change, FDR = false discovery rate.

**Supplementary Table S2: Top 15 KEGG pathways (based on P value) mostly affected by the differentially expressed miRNAs in the TNBC and non-TNBC subtypes of the AA group of patients (DIANA miRPath v.2.0)**

| #  | KEGG pathway                     | P-value  | # Genes | # MiRNAs |
|----|----------------------------------|----------|---------|----------|
| 1  | Pathways in cancer               | 8.22E-34 | 190     | 49       |
| 2  | PI3K-AKT signaling pathway       | 1.49E-33 | 206     | 49       |
| 3  | MAPK signaling pathway           | 1.43E-26 | 155     | 46       |
| 4  | Endocytosis                      | 1.24E-21 | 118     | 45       |
| 5  | Focal adhesion                   | 3.00E-21 | 127     | 47       |
| 6  | Regulation of actin cytoskeleton | 1.10E-20 | 116     | 45       |
| 7  | WNT signaling pathway            | 4.65E-18 | 98      | 47       |
| 8  | Chemokine signaling pathway      | 1.87E-17 | 102     | 47       |
| 9  | Hepatitis B                      | 3.58E-17 | 90      | 45       |
| 10 | Axon guidance                    | 5.81E-16 | 82      | 44       |
| 11 | Ubiquitin mediated proteolysis   | 1.09E-14 | 84      | 44       |
| 12 | Insulin signaling pathway        | 1.09E-14 | 85      | 49       |
| 13 | RNA transport                    | 1.69E-14 | 82      | 43       |
| 14 | Neurotrophin signaling pathway   | 1.69E-14 | 82      | 46       |
| 15 | Measles                          | 1.92E-14 | 79      | 43       |

KEGG = Kyoto Encyclopedia of Genes and Genomes.

**Supplementary Table S3: Top 15 and 12 miRNAs observed up- and down-regulated, respectively, in the TNBC subtype in comparison to the non-TNBC subtype of the NHW group of patients**

| MiRNAs Up-regulated | Log2 FC | P-value  | FDR      | MiRNAs down-regulated                | Log2 FC | P-value  | FDR      |
|---------------------|---------|----------|----------|--------------------------------------|---------|----------|----------|
| hsa-miR-522-3p      | 8.41    | 1.46E-18 | 0        | hsa-miR-1253                         | -4.45   | 2.99E-07 | 2.78E-06 |
| hsa-miR-451a        | 7.12    | 8.63E-12 | 8.63E-10 | hsa-miR-1469                         | -3.26   | 1.84E-07 | 1.82E-06 |
| hsa-miR-150-5p      | 6.68    | 2.61E-09 | 6.14E-08 | hsa-miR-548aa                        | -2.74   | 1.18E-08 | 2.01E-07 |
| hsa-miR-126-3p      | 6.53    | 3.38E-10 | 1.18E-08 | hsa-miR-520d-5p+ miR-518a-5p+miR-527 | -2.52   | 1.79E-07 | 1.81E-06 |
| hsa-miR-223-3p      | 6.41    | 3.29E-10 | 1.20E-08 | hsa-miR-1234                         | -2.25   | 5.18E-06 | 2.82E-05 |
| hsa-miR-374a-5p     | 6.01    | 1.00E-10 | 6.17E-09 | hsa-miR-877-5p                       | -1.89   | 2.01E-05 | 9.20E-05 |
| hsa-miR-125a-5p     | 5.98    | 8.25E-12 | 9.42E-10 | hsa-miR-376a-3p                      | -1.81   | 1.33E-06 | 8.87E-06 |
| hsa-miR-651         | 5.95    | 1.79E-13 | 4.78E-11 | hsa-miR-874                          | -1.50   | 3.11E-04 | 9.73E-04 |
| hsa-miR-182-5p      | 5.75    | 4.61E-13 | 9.22E-11 | hsa-miR-1224-5p                      | -1.50   | 8.42E-04 | 0.002    |
| hsa-miR-762         | 5.70    | 2.31E-12 | 3.07E-10 | hsa-miR-940                          | -1.49   | 0.001    | 0.003    |
| hsa-miR-34a-5p      | 5.60    | 1.78E-10 | 7.50E-09 |                                      |         |          |          |
| hsa-miR-185-5p      | 5.55    | 2.84E-14 | 1.14E-11 |                                      |         |          |          |
| hsa-miR-181a-5p     | 5.19    | 8.43E-09 | 1.57E-07 |                                      |         |          |          |
| hsa-miR-18a-5p      | 5.16    | 5.85E-11 | 4.68E-09 |                                      |         |          |          |
| hsa-miR-191-5p      | 5.13    | 2.56E-09 | 6.20E-08 |                                      |         |          |          |

FC = fold change, FDR = false discovery rate.

**Supplementary Table S4: Top 15 KEGG pathways (based on P value) mostly affected by the differentially expressed miRNAs in the TNBC and non-TNBC subtypes of the NHW group of patients (DIANA miRPath v.2.0)**

| #  | KEGG pathway                            | P-value  | # Genes | # MiRNAs |
|----|-----------------------------------------|----------|---------|----------|
| 1  | Pathways in cancer                      | 5.02E-43 | 191     | 43       |
| 2  | PI3K-AKT signaling pathway              | 2.95E-38 | 181     | 44       |
| 3  | MAPK signaling pathway                  | 2.27E-34 | 159     | 45       |
| 4  | HTLV-I infection                        | 5.00E-30 | 137     | 45       |
| 5  | Endocytosis                             | 1.37E-27 | 119     | 39       |
| 6  | Regulation of actin cytoskeleton        | 1.44E-27 | 124     | 39       |
| 7  | Epstein-Barr virus infection            | 1.92E-24 | 109     | 37       |
| 8  | Focal adhesion                          | 1.46E-23 | 110     | 41       |
| 9  | Transcriptional misregulation in cancer | 2.08E-21 | 102     | 43       |
| 10 | WNT signaling pathway                   | 2.38E-21 | 93      | 41       |
| 11 | Chemokine signaling pathway             | 4.49E-21 | 97      | 40       |
| 12 | Axon guidance                           | 1.40E-20 | 82      | 38       |
| 13 | Hepatitis B                             | 2.68E-20 | 80      | 38       |
| 14 | Neurotrophin signaling pathway          | 1.27E-18 | 83      | 41       |
| 15 | Ubiquitin mediated proteolysis          | 3.19E-18 | 82      | 40       |

KEGG = Kyoto Encyclopedia of Genes and Genomes.

**Supplementary Table S5: Area Under the Curve (AUC) values of the individual 26 miRNAs differentially expressed between the AA and NHW-TNBC group of patients**

| <b>MiRNA</b>     | <b>AUC (95% CI)</b>     |
|------------------|-------------------------|
| hsa-miR-1225-3p  | 0.89 (0.81–0.98)        |
| hsa-miR-216a-5p  | 0.88 (0.78–0.97)        |
| hsa-miR-532-3p   | 0.87 (0.77–0.97)        |
| hsa-miR-580-3p   | 0.87 (0.77–0.97)        |
| hsa-miR-599      | 0.86 (0.75–0.96)        |
| hsa-miR-769-5p   | 0.86 (0.75–0.98)        |
| hsa-miR-18a-5p   | 0.84 (0.73–0.95)        |
| hsa-miR-28-5p    | 0.83 (0.70–0.95)        |
| hsa-miR-182-5p   | 0.83 (0.71–0.94)        |
| hsa-miR-183-5p   | 0.83 (0.72–0.94)        |
| hsa-miR-205-5p   | 0.82 (0.69–0.94)        |
| hsa-miR-4284     | 0.83 (0.72–0.95)        |
| hsa-miR-4458     | 0.83 (0.71–0.95)        |
| hsa-miR-614      | 0.82 (0.70–0.94)        |
| hsa-miR-940      | 0.80 (0.67–0.92)        |
| hsa-miR-1263     | 0.80 (0.68–0.93)        |
| hsa-miR-4431     | 0.80 (0.68–0.92)        |
| hsa-miR-15b-5p   | 0.79 (0.66–0.91)        |
| hsa-miR-17-5p    | 0.79 (0.67–0.92)        |
| hsa-miR-93-5p    | 0.79 (0.66–0.91)        |
| hsa-miR-548ad-3p | 0.79 (0.66–0.92)        |
| hsa-miR-661      | 0.79 (0.65–0.92)        |
| hsa-miR-23a-3p   | 0.78 (0.64–0.91)        |
| hsa-miR-200c-3p  | 0.78 (0.64–0.91)        |
| hsa-miR-3934-5p  | 0.78 (0.65–0.91)        |
| hsa-miR-150-5p   | 0.75 (0.61–0.89)        |
| <b>Score 1</b>   | <b>0.88 (0.78–0.99)</b> |
| (combined panel) |                         |
